# Supplementary material for: Value of biomarkers in predicting mortality in older medical emergency department patients: a Dutch prospective study
Source: PubMed Central journal article supplement — BMJ Open. 2021 Jan 31;11(1):e042989. doi: 10.1136/bmjopen-2020-042989 (PMC7852925; doi:10.1136/bmjopen-2020-042989), 2021-01-31
Supplement: bmjopen-2020-042989.draft_revisions.pdf [file bmjopen-2020-042989.draft_revisions.pdf]

# BMJ Open

BMJ Open is committed to open peer review. As part of this commitment we make the peer review history of every article we publish publicly available.

When an article is published we post the peer reviewers' comments and the authors' responses online. We also post the versions of the paper that were used during peer review. These are the versions that the peer review comments apply to.

The versions of the paper that follow are the versions that were submitted during the peer review process. They are not the versions of record or the final published versions. They should not be cited or distributed as the published version of this manuscript.

BMJ Open is an open access journal and the full, final, typeset and author-corrected version of record of the manuscript is available on our site with no access controls, subscription charges or pay-per-view fees (<http://bmjopen.bmj.com>).

If you have any questions on BMJ Open's open peer review process please email [info.bmjopen@bmj.com](mailto:info.bmjopen@bmj.com)

# BMJ Open

## The value of biomarkers in predicting mortality in older medical emergency department patients

|                               |                                                                                                                                                                                                                                                                                                                                                                                                                                                                                                                                                                                                                                                                                                                                                                                                                                                                                                                                                                                     |
|-------------------------------|-------------------------------------------------------------------------------------------------------------------------------------------------------------------------------------------------------------------------------------------------------------------------------------------------------------------------------------------------------------------------------------------------------------------------------------------------------------------------------------------------------------------------------------------------------------------------------------------------------------------------------------------------------------------------------------------------------------------------------------------------------------------------------------------------------------------------------------------------------------------------------------------------------------------------------------------------------------------------------------|
| Journal:                      | <i>BMJ Open</i>                                                                                                                                                                                                                                                                                                                                                                                                                                                                                                                                                                                                                                                                                                                                                                                                                                                                                                                                                                     |
| Manuscript ID                 | bmjopen-2020-042989                                                                                                                                                                                                                                                                                                                                                                                                                                                                                                                                                                                                                                                                                                                                                                                                                                                                                                                                                                 |
| Article Type:                 | Original research                                                                                                                                                                                                                                                                                                                                                                                                                                                                                                                                                                                                                                                                                                                                                                                                                                                                                                                                                                   |
| Date Submitted by the Author: | 23-Jul-2020                                                                                                                                                                                                                                                                                                                                                                                                                                                                                                                                                                                                                                                                                                                                                                                                                                                                                                                                                                         |
| Complete List of Authors:     | Zelis, Noortje; Maastricht UMC+, Department of Internal Medicine, Division of General Internal Medicine, Section Acute Medicine, Maastricht University Medical Centre, Maastricht ; Maastricht University, CARIM School for Cardiovascular Diseases, Maastricht University, Maastricht Hundscheid, Robin; Zuyderland Medical Centre Heerlen, Department of Internal Medicine and Gastroenterology<br>Buijs, Jacqueline; Zuyderland Medical Centre Heerlen, Department of Internal Medicine and Gastroenterology<br>De Leeuw, Peter; Maastricht Universitair Medisch Centrum+, Internal Medicine; Universiteit Maastricht CARIM School for Cardiovascular Diseases<br>Rajmakers, Maarten; Zuyderland Medical Centre Heerlen, Laboratory of Clinical Chemistry and Haematology<br>van Kuijk, Sander; Maastricht Universitair Medisch Centrum+, Clinical Epidemiology and Medical Technology Assessment<br>Stassen, Patricia; Maastricht University Medical Centre+, Internal Medicine |
| Keywords:                     | ACCIDENT & EMERGENCY MEDICINE, GERIATRIC MEDICINE, INTERNAL MEDICINE                                                                                                                                                                                                                                                                                                                                                                                                                                                                                                                                                                                                                                                                                                                                                                                                                                                                                                                |
|                               |                                                                                                                                                                                                                                                                                                                                                                                                                                                                                                                                                                                                                                                                                                                                                                                                                                                                                                                                                                                     |

SCHOLARONE™  
Manuscripts

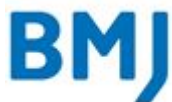

I, the Submitting Author has the right to grant and does grant on behalf of all authors of the Work (as defined in the below author licence), an exclusive licence and/or a non-exclusive licence for contributions from authors who are: i) UK Crown employees; ii) where BMJ has agreed a CC-BY licence shall apply, and/or iii) in accordance with the terms applicable for US Federal Government officers or employees acting as part of their official duties; on a worldwide, perpetual, irrevocable, royalty-free basis to BMJ Publishing Group Ltd ("BMJ") its licensees and where the relevant Journal is co-owned by BMJ to the co-owners of the Journal, to publish the Work in this journal and any other BMJ products and to exploit all rights, as set out in our [licence](#).

The Submitting Author accepts and understands that any supply made under these terms is made by BMJ to the Submitting Author unless you are acting as an employee on behalf of your employer or a postgraduate student of an affiliated institution which is paying any applicable article publishing charge ("APC") for Open Access articles. Where the Submitting Author wishes to make the Work available on an Open Access basis (and intends to pay the relevant APC), the terms of reuse of such Open Access shall be governed by a Creative Commons licence – details of these licences and which [Creative Commons](#) licence will apply to this Work are set out in our licence referred to above.

Other than as permitted in any relevant BMJ Author's Self Archiving Policies, I confirm this Work has not been accepted for publication elsewhere, is not being considered for publication elsewhere and does not duplicate material already published. I confirm all authors consent to publication of this Work and authorise the granting of this licence.

## The value of biomarkers in predicting mortality in older medical emergency department patients

Noortje Zelis, MD<sup>1,2</sup>; Robin Hundscheid, MD<sup>1</sup>; Jacqueline Buijs, MD PhD<sup>1</sup>; Peter W. de Leeuw, MD PhD<sup>1,2,4</sup>; Maarten T.M. Raijmakers, PhD<sup>5</sup>; Sander M.J. van Kuijk, PhD<sup>6</sup>; Patricia M. Stassen, MD PhD<sup>2,3</sup>

<sup>1</sup>Department of Internal Medicine and Gastroenterology, Zuyderland Medical Centre, the Netherlands,  
noortje.zelis@mumc.nl

<sup>2</sup>Department of Internal Medicine, Division of General Internal Medicine, Section Acute Medicine, Maastricht University Medical Centre, Maastricht University, Maastricht, the Netherlands. rhundscheid@live.nl

<sup>3</sup>School of CAPHRI, Maastricht University Medical Centre, Maastricht University, Maastricht, the Netherlands,  
j.buijs@zuyderland.nl

<sup>4</sup>CARIM School for Cardiovascular Diseases, Maastricht University Medical Centre, Maastricht University, Maastricht, the Netherlands, p.deleeuw@maastrichtuniversity.nl

<sup>5</sup>Laboratory of Clinical Chemistry and Haematology, Zuyderland Medical Centre, the Netherlands  
m.raijmakers@zuyderland.nl

<sup>6</sup>Department of Clinical Epidemiology and Medical Technology Assessment, Maastricht University Medical Centre, Maastricht University, Maastricht, the Netherlands, sander.van.kuijk@mumc.nl

### Correspondence to: Patricia Stassen

Maastricht University Medical Centre+

Department of Internal Medicine, Division of General Internal Medicine

PO Box 5800

6202 AZ Maastricht, The Netherlands

p.stassen@mumc.nl

## Abstract

**Objective:** Older emergency department (ED) patients are at high risk of mortality and it is important to predict which patients are at highest risk. Biomarkers lactate, high-sensitivity cardiac Troponin T (hs-cTnT), N-terminal pro-B-type natriuretic peptide (NT-proBNP), D-dimer and procalcitonin may be able to identify those at risk. We aimed to assess the discriminatory value of these biomarkers for 30-day mortality and other adverse outcomes.

1  
2  
3  
4  
5 **Design:** Prospective cohort study. Upon arrival of patients, five biomarkers were measured. Area  
6  
7 under the curves (AUCs) and interval likelihood ratios were calculated to investigate the  
8  
9 discriminatory value of the biomarkers.  
10  
11  
12

13  
14 **Setting:** Emergency department (ED) in The Netherlands.  
15  
16  
17

18  
19 **Participants:** Older ( $\geq 65$  years) medical ED patients, referred for internal medicine or  
20  
21 gastroenterology.  
22  
23

24  
25 **Primary and secondary outcome measures:** 30-day mortality was the primary outcome measure,  
26  
27 while other adverse outcomes (intensive care unit/medium care unit admission, prolonged length of  
28  
29 hospital stay loss of independent living and unplanned readmission) was the secondary outcome  
30  
31 measure.  
32  
33

34  
35  
36 **Results:** The median age of the 450 included patients was 79 years (IQR 73-85). In total, 51 (11.3%)  
37  
38 patients died within 30 days. The AUCs of all biomarkers for prediction of mortality were sufficient to  
39  
40 good, with the highest AUC of 0.73 for hs-cTnT and NT-proBNP. Only for the highest lactate values,  
41  
42 the LR was high enough (29.0) to be applicable for clinical decision making, but this applied to a  
43  
44 minority of patients. The AUC for the composite secondary outcome (intensive and medium care  
45  
46 admission, length of hospital stay  $>7$  days, loss of independent living and unplanned readmission  
47  
48 within 30 days) was lower, ranging between 0.58-0.67.  
49  
50  
51

52  
53  
54 **Conclusions:** Although all 5 biomarkers predict 30-day mortality in older medical ED patients, their  
55  
56 discriminatory value was not good enough to contribute to clinical decision making.  
57  
58  
59  
60

## Strengths and limitations of this study

This was a prospective study in which biomarkers were measured in all older patients, irrespective of the problem they presented with.

The results of these tests were not reported back, except for lactate, and therefore did not influence the doctors.

We calculated not only the total predictive ability of the biomarkers, but also interval likelihood ratio's, as we hypothesized that extreme values do not add to decisionmaking in the same way as values that are intermediate.

The limitations of the study are, besides the single centre design, that not all consecutive patients were included because physicians prioritized to providing care at busy moments.

### Methods:

- Prospective single centre study
- Inclusion of older (>65 y) medical patients
- Five biomarkers were measured upon arrival, irrespective of the complaint of the patient, and these were not reported back to the physicians, except for lactate.
- Discriminatory value with respect to 30-day mortality was calculated as were interval likelihood ratios

**Wordcount:** abstract: 286, manuscript: 2069

## Introduction

### *Background*

Biomarkers such as lactate, high-sensitivity cardiac Troponin T (hs-cTnT), N-terminal pro-B-type natriuretic peptide (NT-proBNP), D-dimer and procalcitonin (PCT) are frequently used to estimate the severity of specific diseases. They are able to detect underlying conditions or diseases that are often present in the older ED population including tissue hypoperfusion, myocardial injury, heart failure, thromboembolism and infections. Although several studies report that these markers are associated with adverse outcomes and predict short-term mortality [5-15], most of these were performed in relatively young ED patients [5-8, 10, 11, 14-16], in selected ED patients with infection or sepsis [10, 14-16] or in patients with non-specific complaints [12]. It is also noteworthy that in these studies biomarkers were only measured when the ED physician deemed this to be indicated, because they were not routinely measured [5-8, 10-12]. Consequently, the true discriminatory value of these biomarkers for prediction of adverse outcomes in ED patients remains unknown.

### *Importance*

Older patients ( $\geq 65$  years) who visit the emergency department (ED) are at a substantial risk of adverse outcomes including short-term mortality, intensive or medium care unit (ICU/MCU) admission, functional decline and readmissions [1-3]. During the ED visit, it is crucial to establish which patients are at highest risk, but this remains a challenging task [4]. It is possible that biomarkers are helpful in establishing this risk.

### *Goals of this investigation*

The aim of this prospective study was to assess the discriminatory value of arterial lactate, hs-cTnT, NT-proBNP, D-dimer and PCT for 30-day mortality and other adverse outcomes (intensive care unit (ICU)/medium care unit (MCU) admission, prolonged length of hospital stay (LOS), loss of

1  
2  
3 independent living and unplanned readmission) when measured routinely in older medical ED  
4  
5 patients.  
6  
7  
8  
9  
10  
11

## 12 **Methods**

### 13 *Study design, setting and selection of participants*

14  
15  
16  
17 This study is part of the RISE UP study, a prospective multicentre study conducted at two EDs in The  
18  
19 Netherlands [18]. This part of the study took place only in Zuyderland MC, a large teaching hospital in  
20  
21 the south of the Netherlands. In all patients, we routinely measured biomarkers at presentation in  
22  
23 the ED. Patients were included if they visited the ED between July 2016 and February 2017, were 65  
24  
25 years or older, examined and treated by an internist or gastroenterologist and if they provided  
26  
27 written informed consent. Exclusion criteria were earlier participation in the study and inability to  
28  
29 speak Dutch, German or English. This study was approved by the medical ethics committee of  
30  
31 Zuyderland MC (NL55867.096.15) and registered on [clinicaltrials.gov](http://clinicaltrials.gov) (NCT02946398).  
32  
33  
34  
35  
36  
37  
38  
39

### 40 *Measurements*

41  
42 At the moment of routine blood sampling at the ED, an additional arterial blood gas sample and two  
43  
44 venous blood samples were drawn. Lactate levels were measured immediately in arterial blood  
45  
46 samples on the RAPIDPoint® 5000 system and were available for the attending physician. Venous  
47  
48 blood samples were centrifuged at 1800g for 10 minutes and plasma was stored in a freezer at -20  
49  
50 °C. D-dimer levels were measured within 4 weeks after presentation using the Sysmex® CS-2100i  
51  
52 system. Plasma was analysed for hs-cTnT, NT-proBNP and PCT levels within 3-4 months by the  
53  
54 Cobas® 8000 modular analyser. Results of all biomarkers, except those for lactate, were blinded for  
55  
56 all health care providers and only available to the investigators. If one of these four biomarkers were  
57  
58  
59  
60



1  
2  
3 ordered by the attending physician as part of normal clinical practice, a different blood sample was  
4  
5 analysed, and the results were reported as usual.  
6  
7  
8  
9

10 Data were collected from electronic medical records. Age, sex and living situation were recorded. In  
11  
12 addition, we retrieved data on comorbidity according to the Charlson Comorbidity Index (CCI)[19]  
13  
14 and triage category (using the Manchester Triage System (MTS)[20]. The abovementioned five  
15  
16 biomarkers were retrieved as well.  
17  
18  
19  
20

### 21 *Outcomes*

22  
23 Thirty-day all-cause mortality, was used as primary endpoint for the discriminatory value of the  
24  
25 biomarkers. The secondary endpoint was a composite endpoint of ICU/MCU admission, prolonged  
26  
27 LOS (>7 days), loss of independent living and unplanned readmission within 30 days after discharge.  
28  
29  
30

### 31 *Patient and public involvement*

32  
33 No patient involved.  
34  
35  
36

### 37 *Analysis*

38 We performed descriptive analyses of baseline characteristics, biomarker levels and outcomes on the  
39  
40 observed data without imputation of missing values. Continuous variables are reported as means  
41  
42 with standard deviations or medians with interquartile ranges (IQRs) and categorical variables as  
43  
44 proportions. Comparisons between the survivor and non-survivor groups were made using unpaired-  
45  
46 t-tests for continuous variables with Gaussian distribution, Mann-Whitney tests for continuous non-  
47  
48 Gaussian data and Pearson's chi-square or Fisher's exact test for categorical data.  
49  
50  
51  
52  
53

54 We calculated the discriminatory value of the biomarkers for the primary and secondary outcome by  
55  
56 constructing the area under the curves (AUCs) of receiver operating characteristics (ROCs) with 95%  
57  
58 confidence intervals (CIs) on the available data. Accuracy of the AUCs was considered excellent if  
59  
60

1  
2  
3 between 0.9-1.0, very good if 0.8-0.9, good if 0.7-0.8, sufficient if 0.6-0.7 and bad if between 0.5-0.6  
4  
5 [21].  
6  
7  
8  
9

10 We divided the biomarkers into 5 groups ranging from lowest through highest values. Next, interval  
11 likelihood ratios (LRs) and mortality percentages were calculated within these groups. We considered  
12 high LRs (>10) and low LR (<0.1) as being of additional value to clinical decision making [22].  
13  
14

15 We used univariable logistic regression to compute the Odds Ratios (ORs) with 95% CIs for the  
16 biomarkers with respect to 30-day mortality. Logistic regression analyses were performed on data  
17 after imputation of missing values to allow for the inclusion of all patients. Missing values of  
18 biomarkers were imputed using stochastic regression imputation with predictive mean matching  
19 (Supplemental Table S1). All biomarkers were tested for collinearity using Pearson's correlation  
20 coefficient and for influential outliers using Cook's distance. Linearity was visually checked for all  
21 biomarkers and log transformed or dichotomised depending on the relationship with the outcome.  
22 For dichotomisation, the optimum cut-off value was chosen based on the values being closest to the  
23 upper left corner of the AUC. If two values were equally distanced, the Youden's Index was used.  
24  
25  
26  
27  
28  
29  
30  
31  
32  
33  
34  
35  
36  
37  
38

39 All data were analysed using IBM SPSS Statistics for Windows, Version 24.0, IBM Corp., Armonk, N.Y.,  
40 USA and p-values  $\leq 0.05$  were considered statistically significant.  
41  
42  
43  
44

## 45 **Results**

### 46 *Characteristics of study subjects*

47  
48  
49  
50 For all 450 patients included during the study period follow up was complete (See Supplemental  
51 Figure S1 for flow chart of inclusion). The median age was 79 years (interquartile range 73-85) and  
52 52% were male. In total, 51 (11.3%) patients died within 30 days after the ED visit and 201 (44.7%)  
53 met the composite endpoint. The patients who died were older than those who survived (p-value  
54  
55  
56  
57  
58  
59  
60

1  
2  
3 <0.001, Table 1). Non-survivors more frequently experienced the composite endpoint (72.5%)  
4  
5 compared to the survivors (41.1%).  
6  
7  
8  
9

### 10 *Main results*

#### 11 *Biomarkers*

12  
13  
14 Four biomarkers hs-cTnT, NT-proBNP, D-dimer and PCT were above the reference range in most  
15  
16 patients (66.4, 86.0, 78.0 and 79.8% , resp.), whereas for lactate, this was true in 25.6% of patients.

17  
18 The highest values of the biomarkers were more often present in non-survivors whereas the lowest  
19  
20 values were more often present in survivors, but there was a large overlap between the non-  
21  
22 survivors and survivors (Fig 1).  
23  
24  
25  
26  
27

#### 28 *Diagnostic accuracy of the biomarkers*

29  
30 The AUCs for prediction of 30-day mortality were sufficient for lactate and PCT with values of 0.68  
31  
32 (95% CI: 0.59-0.77) and 0.67 (95% CI: 0.60-0.75) resp. (Table 2). The AUCs of the other biomarkers  
33  
34 were good with the highest AUCs for hs-cTnT and NT-proBNP with a value of 0.73 (95% CI 0.66 to  
35  
36 0.80) for both. The AUCs of the biomarkers for the composite endpoint were mostly sufficient, but  
37  
38 lower than for mortality (ranging between 0.58 and 0.67).  
39  
40  
41

42  
43 LRs increased with higher biomarker values, except PCT (Table 3). Most of the biomarkers had  
44  
45 maximum LRs between 3.2 (PCT) and 4.7 (NT-proBNP), except lactate. We retrieved a maximum LR of  
46  
47 29.0 when lactate was between 6.0 and 10.0 mmol/L with a mortality percentage of 80.0%. The  
48  
49 maximum LRs were, however, only applicable to a limited number of patients (n=5). The lowest LRs  
50  
51 for all biomarkers were less variable but ranging between 0.3 (NT-proBNP) and 0.6 (lactate).  
52  
53  
54

#### 55 *Univariable logistic regression analysis*

56  
57 Lactate and D-dimer were dichotomised, and hs-cTnT, NT-proBNP and PCT were logarithmically  
58  
59 transformed because they were not linearly associated with 30-day mortality. The optimum cut-off  
60

1  
2  
3 value was >1.5 mmol/L for lactate and >3000 µg/L for D-dimer. None of the biomarkers were highly  
4  
5 correlated. In the univariable logistic regression analysis, all biomarkers were strong predictors of 30-  
6  
7 day mortality with p-values of <0.001 (Table 4).  
8  
9

## 10 11 12 13 14 **Discussion**

15  
16  
17  
18  
19 To the best of our knowledge, this is the first study evaluating the discriminatory value of lactate, hs-  
20  
21 cTnT, NT-proBNP, D-dimer and PCT, when measured routinely, for predicting clinical outcome in  
22  
23 older (≥65 years) medical ED patients. We conclude that these 5 biomarkers are predictive of 30-day  
24  
25 mortality with the best discriminatory values for hs-cTnT and NT-proBNP (AUCs of 0.73). However,  
26  
27 we observed a large overlap in biomarker values between the survivor and non-survivor group,  
28  
29 resulting in suboptimal LRs. Overall, the predictive ability of the biomarkers for the composite  
30  
31 endpoint turned out to be lower than for the primary endpoint.  
32  
33  
34  
35

36  
37  
38 We showed that lactate, hs-cTnT, NT-proBNP, D-dimer and PCT are sufficient to good predictors of  
39  
40 30-day mortality (AUCs ranging from 0.67 to 0.73) and sufficient predictors of the composite  
41  
42 endpoint (AUCs ranging from 0.58 to 0.67) in older medical ED patients. Other studies showed the  
43  
44 same results [10-12, 14, 15, 23-29]. However, in most of these studies, biomarkers were not  
45  
46 measured routinely. Moreover, two studies showed that mortality was lowest in patients in whom  
47  
48 biomarkers were not ordered during normal clinical practice [8, 11]. These findings show that the  
49  
50 predictive value of biomarkers measured in all patients differs from that measured only when  
51  
52 indicated by the physician. We think that the predictive values we found for the biomarkers are more  
53  
54 reflective of their true prognostic ability than when measured on indication.  
55  
56  
57  
58  
59  
60

1  
2  
3 Despite the fact that the 5 biomarkers were overall predictive of 30-day mortality, on an individual  
4 level, we found a large overlap in biomarker values between survivors and non-survivors. The overlap  
5 in biomarker values was most prominent in patients with non-extreme values. Especially in this  
6 group of patients, it is likely that the prognosis of the patient is less evident to the treating physician.  
7  
8 Therefore, an estimation of prognosis provided by a biomarker is highly important. However, the  
9 discriminatory value of biomarker values in these patients was low as illustrated by the moderate  
10 LR. In an US study in trauma patients, clinically meaningful contribution to decision making only  
11 occurred at lactate levels of >9 mmol/L [30], which was only present in a minority of patients. In our  
12 study, lactate had an important LR of 29 when between 6-10 mmol/l, which was only applicable to  
13 five patients. For the secondary composite endpoint, the discriminatory value of the biomarkers was  
14 even lower (ranging between 0.58 and 0.67). Therefore, we conclude that the five biomarkers do not  
15 contribute to clinical decision making.  
16  
17  
18  
19  
20  
21  
22  
23  
24  
25  
26  
27  
28  
29  
30  
31

32 Besides their discriminatory ability, the extra costs for determining the biomarkers should be taken  
33 into account. In more than 90% of patients (75% for lactate), biomarkers were not ordered by the  
34 physician (Supplemental Table S2). Measuring these biomarkers on a routine basis will therefore lead  
35 to direct and indirect costs because abnormal test results (26-86% of results were outside reference  
36 range in our study) will undoubtedly lead to additional diagnostic tests, like CT scans. The relative  
37 limited discriminatory value and the expected extra costs support our conclusion that routinely  
38 determined biomarkers are not beneficial for the care of older ED patients.  
39  
40  
41  
42  
43  
44  
45  
46  
47  
48  
49

50 While we showed that biomarkers, measured at the ED visit, predicts 30-day mortality, it is unknown  
51 whether assessment of these parameters will influence clinical decision making, outcome, well-  
52 being, and medical costs. For this reason, the impact of biomarkers on clinical practice and patient  
53 related outcome measures may be an interesting subject for future studies.  
54  
55  
56  
57  
58  
59  
60

1  
2  
3 Our study has some limitations. First, due to moments of crowding of the ED, it was not possible to  
4 include every possible candidate, as physicians had to give priority to providing emergency care. We  
5 detected no evidence for selection bias but cannot exclude it either [17]. In addition, we only  
6 measured biomarker values immediately after arrival at the ED. It is possible that serial biomarker  
7 measurement may have yielded different information and a different predictive ability.  
8  
9  
10  
11  
12

13  
14  
15  
16 In conclusion, the biomarkers lactate, hs-cTnT, NT-proBNP, D-dimer and PCT, when measured  
17 routinely, have predictive value with regard to short-term mortality and other adverse outcomes in  
18 older medical ED patients, but, given the large overlap in values between those with and without  
19 adverse outcomes, they are unlikely to contribute to clinical decision making. Therefore, we conclude  
20 that routine measurement of these parameters is not recommended.  
21  
22  
23  
24  
25  
26  
27  
28  
29

### 30 **Acknowledgements**

31  
32 We acknowledge the medical and nursing staff of the emergency department of Zuyderland Medical  
33 Centre for their contribution to our study and most of all, all patients who participated in the study.  
34  
35  
36  
37  
38

### 39 **Author contributions**

40  
41 NZ, JB, PWL and PMS are responsible for developing the research question and study design. NZ and  
42 RH collected all data. NZ and PMS are responsible for study management and data collection. NZ and  
43 SMJK performed the statistical analysis. Data was interpreted by all authors and NZ drafted the first  
44 version of the manuscript. MR performed all laboratory tests. RH, JB, PWL, MR, SMJK and PMS  
45 critically revised the manuscript. All authors have read and approved the final version of the  
46 manuscript.  
47  
48  
49  
50  
51  
52  
53  
54  
55  
56

57 **Funding:** Zuyderland MC supported the study by funding NZ. The funding source had no involvement  
58 in the study design, analysis, interpretation, or decision to submit this work  
59  
60

1  
2  
3  
4  
5 **Conflicts of interest statement:** None of the authors have any conflicts of interest to disclose.  
6  
7  
8

9 **Data sharing:** All data are available upon reasonable request  
10  
11  
12

#### 13 LICENCE STATEMENT A 14

15  
16 I, the Submitting Author has the right to grant and does grant on behalf of all authors of the Work (as  
17 defined in the below author licence), an exclusive licence and/or a non-exclusive licence for  
18 contributions from authors who are: i) UK Crown employees; ii) where BMJ has agreed a CC-BY  
19 licence shall apply, and/or iii) in accordance with the terms applicable for US Federal Government  
20 officers or employees acting as part of their official duties; on a worldwide, perpetual, irrevocable,  
21 royalty-free basis to BMJ Publishing Group Ltd ("BMJ") its licensees and where the relevant Journal is  
22 co-owned by BMJ to the co-owners of the Journal, to publish the Work in BMJ Open and any other  
23 BMJ products and to exploit all rights, as set out in our licence.  
24  
25

26  
27 The Submitting Author accepts and understands that any supply made under these terms is made by  
28 BMJ to the Submitting Author unless you are acting as an employee on behalf of your employer or a  
29 postgraduate student of an affiliated institution which is paying any applicable article publishing  
30 charge ("APC") for Open Access articles. Where the Submitting Author wishes to make the Work  
31 available on an Open Access basis (and intends to pay the relevant APC), the terms of reuse of such  
32 Open Access shall be governed by a Creative Commons licence – details of these licences and which  
33 Creative Commons licence will apply to this Work are set out in our licence referred to above.  
34  
35  
36  
37  
38  
39  
40  
41  
42  
43  
44  
45  
46  
47  
48  
49  
50  
51

#### 52 **References** 53

54 [1] Aminzadeh F, Dalziel WB. Older adults in the emergency department: a systematic review of  
55 patterns of use, adverse outcomes, and effectiveness of interventions. *Annals of emergency*  
56 *medicine*. 2002;39:238-47.  
57  
58  
59  
60

- 1  
2  
3 [2] Samaras N, Chevalley T, Samaras D, Gold G. Older patients in the emergency department: a  
4 review. *Annals of emergency medicine*. 2010;56:261-9.  
5  
6  
7 [3] Salvi F, Morichi V, Grilli A, Giorgi R, De Tommaso G, Dessi-Fulgheri P. The elderly in the emergency  
8 department: a critical review of problems and solutions. *Intern Emerg Med*. 2007;2:292-301.  
9  
10  
11 [4] Carpenter CR, Shelton E, Fowler S, Suffoletto B, Platts-Mills TF, Rothman RE, et al. Risk factors and  
12 screening instruments to predict adverse outcomes for undifferentiated older emergency  
13 department patients: a systematic review and meta-analysis. *Academic emergency medicine : official  
14 journal of the Society for Academic Emergency Medicine*. 2015;22:1-21.  
15  
16  
17 [5] Barfod C, Lundstrom LH, Lauritzen MM, Danker JK, Soletormos G, Forberg JL, et al. Peripheral  
18 venous lactate at admission is associated with in-hospital mortality, a prospective cohort study. *Acta  
19 anaesthesiologica Scandinavica*. 2015;59:514-23.  
20  
21  
22 [6] Datta D, Walker C, Gray AJ, Graham C. Arterial lactate levels in an emergency department are  
23 associated with mortality: a prospective observational cohort study. *Emergency medicine journal :  
24 EMJ*. 2015;32:673-7.  
25  
26  
27 [7] Pedersen M, Brandt VS, Holler JG, Lassen AT. Lactate level, aetiology and mortality of adult  
28 patients in an emergency department: a cohort study. *Emergency medicine journal : EMJ*.  
29 2015;32:678-84.  
30  
31  
32 [8] van den Noulund DP, Brouwers MC, Stassen PM. Prognostic value of plasma lactate levels in a  
33 retrospective cohort presenting at a university hospital emergency department. *BMJ open*.  
34 2017;7:e011450.  
35  
36  
37 [9] Bahrmann P, Christ M, Hofner B, Bahrmann A, Achenbach S, Sieber CC, et al. Prognostic value of  
38 different biomarkers for cardiovascular death in unselected older patients in the emergency  
39 department. *European heart journal Acute cardiovascular care*. 2016;5:568-78.  
40  
41  
42 [10] de Groot B, Verdoorn RC, Lameijer J, van der Velden J. High-sensitivity cardiac troponin T is an  
43 independent predictor of inhospital mortality in emergency department patients with suspected  
44  
45  
46  
47  
48  
49  
50  
51  
52  
53  
54  
55  
56  
57  
58  
59  
60



1  
2  
3 infection: a prospective observational derivation study. *Emergency medicine journal : EMJ*.  
4  
5 2014;31:882-8.

6  
7 [11] Courtney D, Conway R, Kavanagh J, O'Riordan D, Silke B. High-sensitivity troponin as an outcome  
8  
9 predictor in acute medical admissions. *Postgraduate medical journal*. 2014;90:311-6.

10  
11 [12] Nickel CH, Kuster T, Keil C, Messmer AS, Geigy N, Bingisser R. Risk stratification using D-dimers in  
12  
13 patients presenting to the emergency department with nonspecific complaints. *European journal of*  
14  
15 *internal medicine*. 2016;31:20-4.

16  
17 [13] Luchner A, Mockel M, Spanuth E, Mocks J, Peetz D, Baum H, et al. N-terminal pro brain  
18  
19 natriuretic peptide in the management of patients in the medical emergency department (PROMPT):  
20  
21 correlation with disease severity, utilization of hospital resources, and prognosis in a large,  
22  
23 prospective, randomized multicentre trial. *European journal of heart failure*. 2012;14:259-67.

24  
25 [14] Rodelo JR, De la Rosa G, Valencia ML, Ospina S, Arango CM, Gomez CI, et al. D-dimer is a  
26  
27 significant prognostic factor in patients with suspected infection and sepsis. *The American journal of*  
28  
29 *emergency medicine*. 2012;30:1991-9.

30  
31 [15] Wilhelm J, Hettwer S, Hammer D, Schurmann M, Christoph A, Amoury M, et al. Outcome  
32  
33 prediction using clinical scores and biomarkers in patients with presumed severe infection in the  
34  
35 emergency department. *Medizinische Klinik, Intensivmedizin und Notfallmedizin*. 2012;107:558-63.

36  
37 [16] Freund Y, Delerme S, Goulet H, Bernard M, Riou B, Hausfater P. Serum lactate and procalcitonin  
38  
39 measurements in emergency room for the diagnosis and risk-stratification of patients with suspected  
40  
41 infection. *Biomarkers : biochemical indicators of exposure, response, and susceptibility to chemicals*.  
42  
43 2012;17:590-6.

44  
45 [17] Zelis N, Buijs J, de Leeuw PW, van Kuijk SMJ, Stassen PM. A new simplified model for predicting  
46  
47 30-day mortality in older medical emergency department patients: The rise up score. *European*  
48  
49 *journal of internal medicine*. 2020.

50  
51 [18] Zelis N, Buijs J, de Leeuw PW, van Kuijk SMJ, Stassen PM. Study protocol for a multicentre  
52  
53 prospective cohort study to identify predictors of adverse outcome in older medical emergency  
54  
55

1  
2  
3 department patients (the Risk Stratification in the Emergency Department in Acutely Ill Older  
4 Patients (RISE UP) study). BMC geriatrics. 2019;19:65.

5  
6  
7 [19] Charlson ME, Pompei P, Ales KL, MacKenzie CR. A new method of classifying prognostic  
8 comorbidity in longitudinal studies: development and validation. J Chronic Dis. 1987;40:373-83.

9  
10  
11 [20] K M-J. Emergency triage. London: BMJ Publishing Group 1997; 1997.

12  
13  
14 [21] Simundic AM. Measures of Diagnostic Accuracy: Basic Definitions. Ejiacc. 2009;19:203-11.

15  
16  
17 [22] Grimes DA, Schulz KF. Refining clinical diagnosis with likelihood ratios. Lancet (London, England).  
18 2005;365:1500-5.

19  
20  
21 [23] Kruse O, Grunnet N, Barfod C. Blood lactate as a predictor for in-hospital mortality in patients  
22 admitted acutely to hospital: a systematic review. Scandinavian journal of trauma, resuscitation and  
23 emergency medicine. 2011;19:74.

24  
25  
26 [24] Park YJ, Kim DH, Kim SC, Kim TY, Kang C, Lee SH, et al. Serum lactate upon emergency  
27 department arrival as a predictor of 30-day in-hospital mortality in an unselected population. PloS  
28 one. 2018;13:e0190519.

29  
30  
31 [25] Puskarich MA, Illich BM, Jones AE. Prognosis of emergency department patients with suspected  
32 infection and intermediate lactate levels: a systematic review. Journal of critical care. 2014;29:334-9.

33  
34  
35 [26] del Portal DA, Shofer F, Mikkelsen ME, Dorsey PJ, Jr., Gaijeski DF, Goyal M, et al. Emergency  
36 department lactate is associated with mortality in older adults admitted with and without infections.  
37 Academic emergency medicine : official journal of the Society for Academic Emergency Medicine.  
38 2010;17:260-8.

39  
40  
41 [27] Marchetti M, Benedetti A, Mimos O, Lardeur JY, Guenezan J, Marjanovic N. Predictors of 30-day  
42 mortality in patients admitted to ED for acute heart failure. The American journal of emergency  
43 medicine. 2017;35:444-7.

44  
45  
46 [28] Meyer B, Huelsmann M, Wexberg P, Delle Karth G, Berger R, Moertl D, et al. N-terminal pro-B-  
47 type natriuretic peptide is an independent predictor of outcome in an unselected cohort of critically  
48 ill patients. Critical care medicine. 2007;35:2268-73.

1  
2  
3 [29] Zhao Y, Li C, Jia Y. Evaluation of the Mortality in Emergency Department Sepsis score combined  
4 with procalcitonin in septic patients. The American journal of emergency medicine. 2013;31:1086-91.  
5  
6

7 [30] Baron BJ, Nguyen A, Stefanov D, Shetty A, Zehtabchi S. Clinical value of triage lactate in risk  
8 stratifying trauma patients using interval likelihood ratios. The American journal of emergency  
9 medicine. 2018;36:784-8.  
10  
11  
12  
13  
14  
15  
16  
17  
18  
19  
20  
21  
22  
23  
24  
25  
26  
27  
28  
29  
30  
31  
32  
33  
34  
35  
36  
37  
38  
39  
40  
41  
42  
43  
44  
45  
46  
47  
48  
49  
50  
51  
52  
53  
54  
55  
56  
57  
58  
59  
60

For peer review only

**Table 1.** Baseline characteristics of study participants

|                               | Reference Values | Total N=450 | Non-survivors N=51 | Survivors N=399  | <sup>a</sup> |
|-------------------------------|------------------|-------------|--------------------|------------------|--------------|
| Age, median (IQR), years      |                  | 450         | 83 (77-87)         | 79 (73-85)       | ***          |
| Male sex, n %                 |                  | 450         | 26 (51.0)          | 208 (52.1)       |              |
| Community-dwelling, n %       |                  | 450         | 36 (70.6)          | 353 (88.5)       | ***          |
| CCI score, median (IQR)       |                  | 450         | 3 (2-5)            | 2 (1-3)          | **           |
| MTS category, n %             |                  | 447         |                    |                  | *            |
| Red                           |                  |             | 2 (3.9)            | 1 (0.3)          |              |
| Orange                        |                  |             | 10 (19.6)          | 46 (11.6)        |              |
| Yellow                        |                  |             | 28 (54.9)          | 226 (57.1)       |              |
| Green                         |                  |             | 11 (21.6)          | 122 (30.8)       |              |
| Blue                          |                  |             | -                  | 1 (0.3)          |              |
| <b>Biomarkers</b>             |                  |             |                    |                  |              |
| lactate, median (IQR), mmol/L | 0.6-1.8          | 378         | 2.0 (1.5-2.8)      | 1.4 (1.0-1.9)    | ***          |
| hs-cTnT, median (IQR), ng/L   | <14              | 425         | 42 (26-84)         | 21 (12-39)       | ***          |
| NT-proBNP, median (IQR), ng/L | <125             | 424         | 2766 (943-11597)   | 759 (266-2377)   | ***          |
| D-dimer, median (IQR), µg/L   | <500             | 407         | 3445 (1281-6497)   | 1251 (660-2804)  | ***          |
| PCT, median (IQR), ng/mL      | <0.05            | 424         | 0.32 (0.13-1.40)   | 0.12 (0.06-0.31) | ***          |

CCI=Charlson Comorbidity Index; hs-cTnT=high-sensitivity cardiac Troponin T; IQR=interquartile range; MTS=Manchester Triage System; NT-proBNP=N-terminal pro-B-type natriuretic peptide; PCT=procalcitonin; SD=standard deviation

Analysis in this table made using non-imputed data

<sup>a</sup>Significant difference between non-survivors and survivors with a p-value of 0.01- <0.05 (\*), 0.001- <0.01 (\*\*) or <0.001 (\*\*\*)

**Table 2.** AUCs for the biomarkers with respect to mortality and the composite endpoint

| Biomarker | n   | AUC (95 % CI)      |                    |
|-----------|-----|--------------------|--------------------|
|           |     | 30-day mortality   | Composite endpoint |
| lactate   | 378 | 0.68 (0.59 – 0.77) | 0.62 (0.56 – 0.67) |
| hs-cTnT   | 425 | 0.73 (0.66 – 0.80) | 0.67 (0.61 – 0.72) |
| NT-proBNP | 424 | 0.73 (0.66 – 0.80) | 0.65 (0.60 – 0.71) |
| D-dimer   | 407 | 0.70 (0.62 – 0.77) | 0.58 (0.52 – 0.64) |
| PCT       | 424 | 0.67 (0.60 – 0.75) | 0.65 (0.60 – 0.70) |

AUC=area under the curve; CI=confidence interval; hs-cTnT=high-sensitivity cardiac Troponin T; NT-proBNP=N-terminal pro-B-type natriuretic peptide; PCT=procalcitonin

Analysis in this table made using non-imputed data

**Table 3.** Interval likelihood ratios for the biomarkers

| Biomarker               | Mortality |            | N   | LR   | Observed Mortality (%) |
|-------------------------|-----------|------------|-----|------|------------------------|
|                         | Yes (n %) | No (n %)   |     |      |                        |
| <b>lactate (mmol/L)</b> |           |            |     |      |                        |
| 0 – 1.0                 | 5 (10.9)  | 62 (18.7)  | 67  | 0.6  | 7.5                    |
| >1.0 – 2.0              | 20 (43.5) | 197 (59.3) | 217 | 0.7  | 9.2                    |
| >2.0 – 4.0              | 14 (30.4) | 65 (19.6)  | 79  | 1.6  | 17.7                   |
| >4.0 – 6.0              | 3 (6.5)   | 7 (2.1)    | 10  | 3.1  | 30.0                   |
| >6.0 – 10.0             | 4 (8.7)   | 1 (0.3)    | 5   | 29.0 | 80.0                   |
| <b>hs-cTnT (ng/L)</b>   |           |            |     |      |                        |
| 0 – 20                  | 9 (18.4)  | 184 (48.9) | 193 | 0.4  | 4.7                    |
| >20 – 40                | 13 (26.5) | 102 (27.1) | 115 | 1.0  | 11.3                   |
| >40 – 60                | 11 (22.4) | 44 (11.7)  | 55  | 1.9  | 20.0                   |
| >60 – 100               | 8 (16.3)  | 28 (7.4)   | 36  | 2.2  | 22.2                   |
| >100                    | 8 (16.3)  | 18 (4.8)   | 26  | 3.4  | 30.8                   |
| <b>NT-proBNP (ng/L)</b> |           |            |     |      |                        |
| 0 – 500                 | 6 (12.2)  | 150 (40.0) | 156 | 0.3  | 3.8                    |
| >500 – 1000             | 7 (14.3)  | 69 (18.4)  | 76  | 0.8  | 9.2                    |
| >1000 – 2500            | 9 (18.4)  | 67 (17.9)  | 76  | 1.0  | 11.8                   |
| >2500 – 10,000          | 14 (28.6) | 68 (18.1)  | 82  | 1.6  | 17.1                   |
| >10,000                 | 13 (26.5) | 21 (5.6)   | 34  | 4.7  | 38.2                   |
| <b>D-dimer (µg/L)</b>   |           |            |     |      |                        |
| 0 – 1000                | 8 (17.0)  | 149 (41.1) | 157 | 0.4  | 5.1                    |
| >1000 – 2500            | 12 (25.5) | 112 (31.1) | 124 | 0.8  | 9.7                    |
| >2500 – 5000            | 12 (25.5) | 56 (15.6)  | 68  | 1.6  | 17.6                   |
| >5000 – 10,000          | 9 (19.1)  | 30 (8.3)   | 39  | 2.3  | 23.1                   |
| >10,000                 | 6 (12.8)  | 13 (3.6)   | 19  | 3.6  | 31.6                   |
| <b>PCT (ng/L)</b>       |           |            |     |      |                        |
| 0 – 0.1                 | 10 (20.4) | 166 (44.3) | 176 | 0.5  | 5.7                    |
| >0.1 – 0.5              | 16 (32.7) | 137 (36.5) | 153 | 0.9  | 10.5                   |
| >0.5 – 1.0              | 6 (12.2)  | 21 (5.6)   | 27  | 2.2  | 22.2                   |
| >1.0 – 5.0              | 12 (24.5) | 29 (7.7)   | 41  | 3.2  | 29.3                   |
| >5.0                    | 5 (10.2)  | 22 (5.9)   | 27  | 1.7  | 18.5                   |

hs-cTnT=high-sensitivity cardiac Troponin T; LR=likelihood ratio; NT-proBNP=N-terminal pro-B-type natriuretic peptide; PCT=procalcitonin

**Table 4.** Univariable logistic regression analysis for 30-day mortality

| Predictors                        | Univariable analysis |         |
|-----------------------------------|----------------------|---------|
|                                   | Odds Ratio (95% CI)  | P-value |
| lactate >1.5 mmol/L               | 4.29 (2.18-8.44)     | <0.001  |
| hs-cTnT – per log ng/L increase   | 2.36 (1.70-3.27)     | <0.001  |
| NT-proBNP – per log ng/L increase | 1.78 (1.45-2.18)     | <0.001  |
| D-dimer >3000 µg/L                | 2.91 (1.61-5.28)     | <0.001  |
| PCT – per log ng/mL increase      | 1.34 (1.15-1.56)     | <0.001  |

CI=confidence interval; hs-cTnT=high-sensitivity cardiac Troponin T; log=logarithm; NT-proBNP=N-terminal pro-B-type natriuretic peptide; PCT=procalcitonin  
 Analysis in this table made using imputed data

### Legends of figures

**Figure 1. Distribution of the five biomarkers among survivors and non-survivors.** Bars represent the proportion of patients with the according biomarker value within the survivor and non-survivor group.

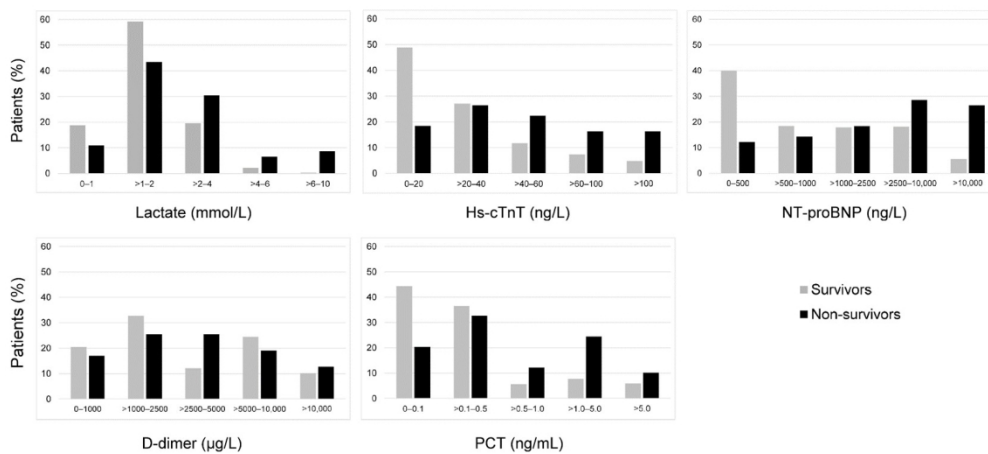

Figure 1. Distribution of the five biomarkers among survivors and non-survivors. Bars represent the proportion of patients with the according biomarker value within the survivor and non-survivor group.

284x129mm (150 x 150 DPI)



## Supplemental File

## Supplementary tables

**Supplemental Table S1. Overview imputed values**

| Imputed variable | Total<br>(n=450) |
|------------------|------------------|
|                  | n (%)            |
| Lactate          | 72 (16.0)        |
| Hs-cTnT          | 25 (5.6)         |
| NT-proBNP        | 26 (5.8)         |
| D-dimer          | 43 (9.6)         |
| PCT              | 26 (5.8)         |

Hs-cTnT, high-sensitivity cardiac Troponin T; NT-proBNP, N-terminal pro-B-type natriuretic peptide; PCT, procalcitonin

**Supplemental Table S2. Biomarkers ordered by the physician**

| Biomarker | % of patients <sup>a</sup> |
|-----------|----------------------------|
| Lactate   | 25.8                       |
| Hs-cTnT   | 7.6                        |
| NT-proBNP | 8.7                        |
| D-dimer   | 5.1                        |
| PCT       | 0.0                        |

Hs-cTnT, high-sensitivity cardiac Troponin T; NT-pro-BNP, N-terminal pro-B-type natriuretic peptide; PCT, procalcitonin

<sup>a</sup>Represents the proportion of patients for whom the biomarker was ordered by the physician

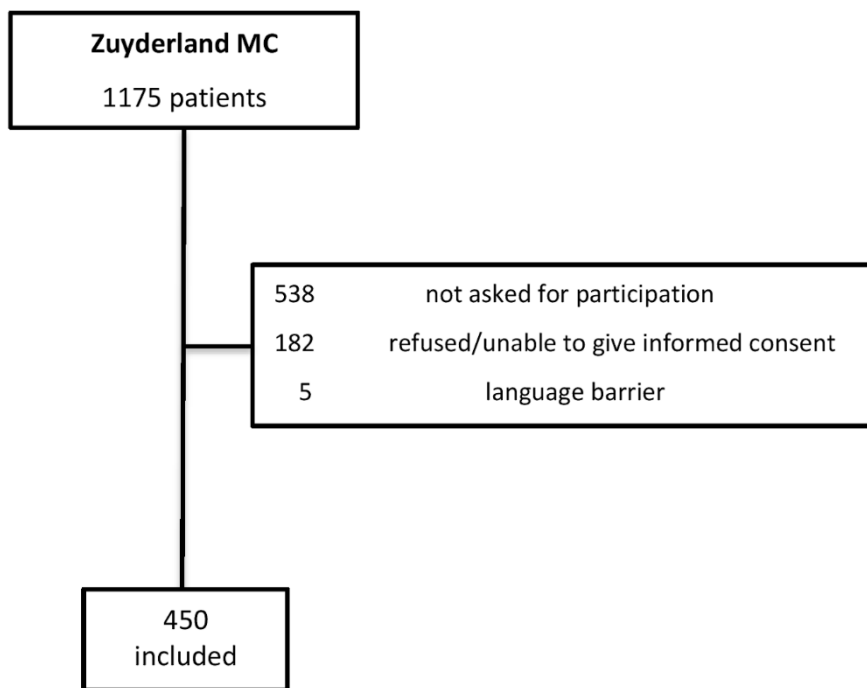

**Supplementary Figure S1.** Flowchart of patient selection in Zuyderland MC.

**STROBE 2007 (v4) Statement—Checklist of items that should be included in reports of *cohort studies***

| Section/Topic                | Item # | Recommendation                                                                                                                                                                       | Reported on page # |
|------------------------------|--------|--------------------------------------------------------------------------------------------------------------------------------------------------------------------------------------|--------------------|
| <b>Title and abstract</b>    | 1      | (a) Indicate the study's design with a commonly used term in the title or the abstract                                                                                               | 1                  |
|                              |        | (b) Provide in the abstract an informative and balanced summary of what was done and what was found                                                                                  | 1                  |
| <b>Introduction</b>          |        |                                                                                                                                                                                      |                    |
| Background/rationale         | 2      | Explain the scientific background and rationale for the investigation being reported                                                                                                 | 4                  |
| Objectives                   | 3      | State specific objectives, including any prespecified hypotheses                                                                                                                     | 4-5                |
| <b>Methods</b>               |        |                                                                                                                                                                                      |                    |
| Study design                 | 4      | Present key elements of study design early in the paper                                                                                                                              | 5                  |
| Setting                      | 5      | Describe the setting, locations, and relevant dates, including periods of recruitment, exposure, follow-up, and data collection                                                      | 5                  |
| Participants                 | 6      | (a) Give the eligibility criteria, and the sources and methods of selection of participants. Describe methods of follow-up                                                           | 5                  |
|                              |        | (b) For matched studies, give matching criteria and number of exposed and unexposed                                                                                                  | n.a.               |
| Variables                    | 7      | Clearly define all outcomes, exposures, predictors, potential confounders, and effect modifiers. Give diagnostic criteria, if applicable                                             | 5-6                |
| Data sources/<br>measurement | 8*     | For each variable of interest, give sources of data and details of methods of assessment (measurement). Describe comparability of assessment methods if there is more than one group | 5-6                |
| Bias                         | 9      | Describe any efforts to address potential sources of bias                                                                                                                            | 6-7                |
| Study size                   | 10     | Explain how the study size was arrived at                                                                                                                                            | 5                  |
| Quantitative variables       | 11     | Explain how quantitative variables were handled in the analyses. If applicable, describe which groupings were chosen and why                                                         | 6-7                |
| Statistical methods          | 12     | (a) Describe all statistical methods, including those used to control for confounding                                                                                                | 6-7                |
|                              |        | (b) Describe any methods used to examine subgroups and interactions                                                                                                                  | n.a.               |
|                              |        | (c) Explain how missing data were addressed                                                                                                                                          | 7                  |
|                              |        | (d) If applicable, explain how loss to follow-up was addressed                                                                                                                       | n.a.               |
|                              |        | (e) Describe any sensitivity analyses                                                                                                                                                | n.a.               |
| <b>Results</b>               |        |                                                                                                                                                                                      |                    |

|                          |     |                                                                                                                                                                                                              |                   |
|--------------------------|-----|--------------------------------------------------------------------------------------------------------------------------------------------------------------------------------------------------------------|-------------------|
| Participants             | 13* | (a) Report numbers of individuals at each stage of study—eg numbers potentially eligible, examined for eligibility, confirmed eligible, included in the study, completing follow-up, and analysed            | 7                 |
|                          |     | (b) Give reasons for non-participation at each stage                                                                                                                                                         | 7 and suppl fig 1 |
|                          |     | (c) Consider use of a flow diagram                                                                                                                                                                           | suppl fig 1       |
| Descriptive data         | 14* | (a) Give characteristics of study participants (eg demographic, clinical, social) and information on exposures and potential confounders                                                                     | 7                 |
|                          |     | (b) Indicate number of participants with missing data for each variable of interest                                                                                                                          | suppl table 1     |
|                          |     | (c) Summarise follow-up time (eg, average and total amount)                                                                                                                                                  | 7                 |
| Outcome data             | 15* | Report numbers of outcome events or summary measures over time                                                                                                                                               | 7                 |
| Main results             | 16  | (a) Give unadjusted estimates and, if applicable, confounder-adjusted estimates and their precision (eg, 95% confidence interval). Make clear which confounders were adjusted for and why they were included | 8 and tables      |
|                          |     | (b) Report category boundaries when continuous variables were categorized                                                                                                                                    | 8 and table 3     |
|                          |     | (c) If relevant, consider translating estimates of relative risk into absolute risk for a meaningful time period                                                                                             | table 3 and 8     |
| Other analyses           | 17  | Report other analyses done—eg analyses of subgroups and interactions, and sensitivity analyses                                                                                                               | n.a.              |
| <b>Discussion</b>        |     |                                                                                                                                                                                                              |                   |
| Key results              | 18  | Summarise key results with reference to study objectives                                                                                                                                                     | 9-11              |
| <b>Limitations</b>       |     |                                                                                                                                                                                                              |                   |
| Interpretation           | 20  | Give a cautious overall interpretation of results considering objectives, limitations, multiplicity of analyses, results from similar studies, and other relevant evidence                                   | 10-11             |
| Generalisability         | 21  | Discuss the generalisability (external validity) of the study results                                                                                                                                        | 9                 |
| <b>Other information</b> |     |                                                                                                                                                                                                              |                   |
| Funding                  | 22  | Give the source of funding and the role of the funders for the present study and, if applicable, for the original study on which the present article is based                                                |                   |

\*Give information separately for cases and controls in case-control studies and, if applicable, for exposed and unexposed groups in cohort and cross-sectional studies.

**Note:** An Explanation and Elaboration article discusses each checklist item and gives methodological background and published examples of transparent reporting. The STROBE checklist is best used in conjunction with this article (freely available on the Web sites of PLoS Medicine at <http://www.plosmedicine.org/>, Annals of Internal Medicine at <http://www.annals.org/>, and Epidemiology at <http://www.epidem.com/>). Information on the STROBE Initiative is available at [www.strobe-statement.org](http://www.strobe-statement.org).

# BMJ Open

## The value of biomarkers in predicting mortality in older medical emergency department patients: a Dutch prospective study

|                                 |                                                                                                                                                                                                                                                                                                                                                                                                                                                                                                                                                                                                                                                                                                                                                                                                                                                                                                                                                                                      |
|---------------------------------|--------------------------------------------------------------------------------------------------------------------------------------------------------------------------------------------------------------------------------------------------------------------------------------------------------------------------------------------------------------------------------------------------------------------------------------------------------------------------------------------------------------------------------------------------------------------------------------------------------------------------------------------------------------------------------------------------------------------------------------------------------------------------------------------------------------------------------------------------------------------------------------------------------------------------------------------------------------------------------------|
| Journal:                        | <i>BMJ Open</i>                                                                                                                                                                                                                                                                                                                                                                                                                                                                                                                                                                                                                                                                                                                                                                                                                                                                                                                                                                      |
| Manuscript ID                   | bmjopen-2020-042989.R1                                                                                                                                                                                                                                                                                                                                                                                                                                                                                                                                                                                                                                                                                                                                                                                                                                                                                                                                                               |
| Article Type:                   | Original research                                                                                                                                                                                                                                                                                                                                                                                                                                                                                                                                                                                                                                                                                                                                                                                                                                                                                                                                                                    |
| Date Submitted by the Author:   | 13-Nov-2020                                                                                                                                                                                                                                                                                                                                                                                                                                                                                                                                                                                                                                                                                                                                                                                                                                                                                                                                                                          |
| Complete List of Authors:       | Zelis, Noortje; Maastricht UMC+, Department of Internal Medicine, Division of General Internal Medicine, Section Acute Medicine, Maastricht University Medical Centre, Maastricht ; Maastricht University, CARIM School for Cardiovascular Diseases, Maastricht University, Maastricht Hundscheid, Robin; Zuyderland Medical Centre Heerlen, Department of Internal Medicine and Gastroenterology<br>Buijs, Jacqueline; Zuyderland Medical Centre Heerlen, Department of Internal Medicine and Gastroenterology<br>De Leeuw, Peter; Maastricht Universitair Medisch Centrum+, Internal Medicine; Universiteit Maastricht CARIM School for Cardiovascular Diseases<br>Raijmakers, Maarten; Zuyderland Medical Centre Heerlen, Laboratory of Clinical Chemistry and Haematology<br>van Kuijk, Sander; Maastricht Universitair Medisch Centrum+, Clinical Epidemiology and Medical Technology Assessment<br>Stassen, Patricia; Maastricht University Medical Centre+, Internal Medicine |
| <b>Primary Subject Heading</b>: | Emergency medicine                                                                                                                                                                                                                                                                                                                                                                                                                                                                                                                                                                                                                                                                                                                                                                                                                                                                                                                                                                   |
| Secondary Subject Heading:      | Geriatric medicine                                                                                                                                                                                                                                                                                                                                                                                                                                                                                                                                                                                                                                                                                                                                                                                                                                                                                                                                                                   |
| Keywords:                       | ACCIDENT & EMERGENCY MEDICINE, GERIATRIC MEDICINE, INTERNAL MEDICINE                                                                                                                                                                                                                                                                                                                                                                                                                                                                                                                                                                                                                                                                                                                                                                                                                                                                                                                 |
|                                 |                                                                                                                                                                                                                                                                                                                                                                                                                                                                                                                                                                                                                                                                                                                                                                                                                                                                                                                                                                                      |

SCHOLARONE™  
Manuscripts

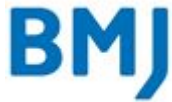

I, the Submitting Author has the right to grant and does grant on behalf of all authors of the Work (as defined in the below author licence), an exclusive licence and/or a non-exclusive licence for contributions from authors who are: i) UK Crown employees; ii) where BMJ has agreed a CC-BY licence shall apply, and/or iii) in accordance with the terms applicable for US Federal Government officers or employees acting as part of their official duties; on a worldwide, perpetual, irrevocable, royalty-free basis to BMJ Publishing Group Ltd ("BMJ") its licensees and where the relevant Journal is co-owned by BMJ to the co-owners of the Journal, to publish the Work in this journal and any other BMJ products and to exploit all rights, as set out in our [licence](#).

The Submitting Author accepts and understands that any supply made under these terms is made by BMJ to the Submitting Author unless you are acting as an employee on behalf of your employer or a postgraduate student of an affiliated institution which is paying any applicable article publishing charge ("APC") for Open Access articles. Where the Submitting Author wishes to make the Work available on an Open Access basis (and intends to pay the relevant APC), the terms of reuse of such Open Access shall be governed by a Creative Commons licence – details of these licences and which [Creative Commons](#) licence will apply to this Work are set out in our licence referred to above.

Other than as permitted in any relevant BMJ Author's Self Archiving Policies, I confirm this Work has not been accepted for publication elsewhere, is not being considered for publication elsewhere and does not duplicate material already published. I confirm all authors consent to publication of this Work and authorise the granting of this licence.

1  
2  
3 **The value of biomarkers in predicting mortality in older medical emergency department patients: a**  
4  
5 **Dutch prospective study**  
6

7 Noortje Zelis, MD<sup>1,2</sup>; Robin Hundscheid, MD<sup>1</sup>; Jacqueline Buijs, MD PhD<sup>1</sup>; Peter W. de Leeuw, MD PhD<sup>1,2,4</sup>; Maarten T.M.  
8 Raijmakers, PhD<sup>5</sup>; Sander M.J. van Kuijk, PhD<sup>6</sup>; Patricia M. Stassen, MD PhD<sup>2,3</sup>  
9

10  
11  
12  
13 <sup>1</sup>Department of Internal Medicine and Gastroenterology, Zuyderland Medical Centre, the Netherlands,  
14 noortje.zelis@mumc.nl

15  
16 <sup>2</sup>Department of Internal Medicine, Division of General Internal Medicine, Section Acute Medicine, Maastricht University  
17 Medical Centre, Maastricht University, Maastricht, the Netherlands. rhundscheid@live.nl

18  
19 <sup>3</sup>School of CAPHRI, Maastricht University Medical Centre, Maastricht University, Maastricht, the Netherlands,  
20 j.buijs@zuyderland.nl  
21

22  
23 <sup>4</sup>CARIM School for Cardiovascular Diseases, Maastricht University Medical Centre, Maastricht University, Maastricht, the  
24 Netherlands, p.deleeuw@maastrichtuniversity.nl  
25

26  
27 <sup>5</sup>Laboratory of Clinical Chemistry and Haematology, Zuyderland Medical Centre, the Netherlands  
28 m.raijmakers@zuyderland.nl  
29

30  
31 <sup>6</sup>Department of Clinical Epidemiology and Medical Technology Assessment, Maastricht University Medical Centre,  
32 Maastricht University, Maastricht, the Netherlands, sander.van.kuijk@mumc.nl  
33

34  
35  
36 **Correspondence to: Patricia Stassen**

37  
38 Maastricht University Medical Centre+  
39  
40 Department of Internal Medicine, Division of General Internal Medicine  
41  
42 PO Box 5800  
43  
44 6202 AZ Maastricht, The Netherlands  
45  
46 p.stassen@mumc.nl  
47  
48  
49  
50  
51  
52  
53  
54  
55  
56  
57  
58  
59  
60

## Abstract

**Objective:** Older emergency department (ED) patients are at high risk of mortality and it is important to predict which patients are at highest risk. Biomarkers lactate, high-sensitivity cardiac Troponin T (hs-cTnT), N-terminal pro-B-type natriuretic peptide (NT-proBNP), D-dimer and procalcitonin may be able to identify those at risk. We aimed to assess the discriminatory value of these biomarkers for 30-day mortality and other adverse outcomes.

**Design:** Prospective cohort study. Upon arrival of patients, five biomarkers were measured. Area under the curves (AUCs) and interval likelihood ratios were calculated to investigate the discriminatory value of the biomarkers.

**Setting:** Emergency department (ED) in The Netherlands.

**Participants:** Older ( $\geq 65$  years) medical ED patients, referred for internal medicine or gastroenterology.

**Primary and secondary outcome measures:** 30-day mortality was the primary outcome measure, while other adverse outcomes (intensive care unit/medium care unit admission, prolonged length of hospital stay, loss of independent living and unplanned readmission) was the composite secondary outcome measure.

**Results:** The median age of the 450 included patients was 79 years (IQR 73-85). In total, 51 (11.3%) patients died within 30 days. The AUCs of all biomarkers for prediction of mortality were sufficient to good, with the highest AUC of 0.73 for hs-cTnT and NT-proBNP. Only for the highest lactate values, the LR was high enough (29.0) to be applicable for clinical decision making, but this applied to a



1  
2  
3 minority of patients. The AUC for the composite secondary outcome (intensive and medium care  
4 admission, length of hospital stay >7 days, loss of independent living and unplanned readmission  
5 within 30 days) was lower, ranging between 0.58-0.67.  
6  
7  
8  
9

10  
11  
12 **Conclusions:** Although all 5 biomarkers predict 30-day mortality in older medical ED patients, their  
13 individual discriminatory value was not high enough to contribute to clinical decision making.  
14  
15  
16

### 17 18 19 **Strengths and limitations of this study**

20  
21 This was a prospective study in which biomarkers were measured in all older patients, irrespective of  
22 the problem they presented with.  
23

24  
25 The results of these tests were not reported back, except for lactate, and therefore did not influence  
26 the doctors.  
27

28  
29 We calculated not only the total predictive ability of the biomarkers, but also interval likelihood  
30 ratio's, as we hypothesised that extreme values do not add to decision making in the same way as  
31 values that are intermediate.  
32  
33

34  
35 The limitations of the study are, besides the single centre design, that not all consecutive patients  
36 were included because physicians prioritised to providing care at busy moments.  
37  
38  
39  
40  
41  
42  
43  
44  
45  
46  
47  
48  
49  
50  
51  
52  
53  
54  
55  
56  
57  
58  
59  
60

## Introduction

### *Background*

Biomarkers such as lactate, high-sensitivity cardiac Troponin T (hs-cTnT), N-terminal pro-B-type natriuretic peptide (NT-proBNP), D-dimer and procalcitonin (PCT) are frequently used to diagnose and estimate the severity of specific diseases. They are able to detect underlying conditions or diseases that are often present in older patients ( $\geq 65$  years) who visit the emergency department (ED). These include tissue hypoperfusion, myocardial injury, heart failure, thromboembolism and infections. Although several studies report that these markers are associated with adverse outcomes and predict short-term mortality<sup>1-11</sup>, most of these were performed in relatively young ED patients<sup>1-4</sup><sup>6 7 10-12</sup>, in selected ED patients with infection or sepsis<sup>6 10-12</sup> or in patients with non-specific complaints<sup>8</sup>. It is also noteworthy that in these studies biomarkers were only measured when the ED physician deemed this to be indicated, because they were not routinely measured<sup>1-4 6-8</sup>. Consequently, the true discriminatory value of these biomarkers for prediction of adverse outcomes in ED patients remains unknown.

### *Importance*

Older patients who visit the ED are at a substantial risk of adverse outcomes including short-term mortality, intensive or medium care unit (ICU/MCU) admission, functional decline and readmissions<sup>13-15</sup>. During the ED visit, it is crucial to establish which older patients are at highest risk, but this remains a challenging task<sup>16</sup>. It is possible that biomarkers are helpful in establishing this risk.

### *Goals of this investigation*

The aim of this prospective study was to assess the discriminatory value of arterial lactate, hs-cTnT, NT-proBNP, D-dimer and PCT for 30-day mortality and other adverse outcomes (intensive care unit (ICU)/medium care unit (MCU) admission, prolonged length of hospital stay (LOS), loss of

1  
2  
3 independent living and unplanned readmission) when measured routinely in older medical ED  
4  
5 patients.  
6  
7  
8  
9  
10

## 11 **Methods**

### 12 *Study design, setting and selection of participants*

13  
14  
15  
16  
17 This study is part of the RISE UP study, a prospective multicentre study conducted at two EDs in The  
18 Netherlands. The study protocol of this study was published online <sup>17</sup>. This part of the study took  
19 place in Zuyderland MC, a large teaching hospital in the south of the Netherlands, because  
20 biomarkers were measured in patients included in this site only. Patients were included if they visited  
21 the ED between July 2016 and February 2017, were 65 years or older, examined and treated by an  
22 internist or gastroenterologist and if they provided written informed consent. Exclusion criteria were  
23 earlier participation in the study and inability to speak Dutch, German or English. This study was  
24 approved by the medical ethics committee of Zuyderland MC (NL55867.096.15) and registered on  
25 clinicaltrials.gov (NCT02946398).  
26  
27  
28  
29  
30  
31  
32  
33  
34  
35  
36  
37  
38  
39  
40  
41

### 42 *Measurements*

43  
44 At the moment of routine blood sampling at the ED, an additional arterial blood gas sample and two  
45 venous blood samples were drawn. Lactate levels were measured immediately in arterial blood  
46 samples on the RAPIDPoint® 5000 system and were available for the attending physician. Venous  
47 blood samples were centrifuged at 1800g for 10 minutes and plasma was stored in a freezer at -20  
48 °C. D-dimer levels were measured within 4 weeks after presentation using the Sysmex® CS-2100i  
49 system. Plasma was analysed for hs-cTnT, NT-proBNP and PCT levels within 3-4 months by the  
50 Cobas® 8000 modular analyser. Results of all biomarkers, except those for lactate, were blinded for  
51 all health care providers and only available to the investigators. If one of these four biomarkers were  
52  
53  
54  
55  
56  
57  
58  
59  
60

1  
2  
3 ordered by the attending physician as part of normal clinical practice, a different blood sample was  
4  
5 analysed, and the results were reported as usual.  
6  
7  
8  
9

10 All data were collected from electronic medical records. The following data were retrieved upon  
11 arrival at the ED visit: age, sex and living situation, data on comorbidity according to the Charlson  
12 Comorbidity Index (CCI)<sup>18</sup> and triage category (using the Manchester Triage System (MTS)<sup>19</sup>. The  
13  
14 abovementioned five biomarkers were retrieved as well.  
15  
16  
17  
18  
19  
20

### 21 *Outcomes*

22  
23 Thirty-day all-cause mortality, was used as primary endpoint for the discriminatory value of the  
24 biomarkers. The secondary endpoint was a composite endpoint of ICU/MCU admission, prolonged  
25 LOS (>7 days), loss of independent living and unplanned readmission within 30 days after discharge.  
26  
27 Length of hospital stay was retrieved for patients who were admitted immediately following the ED  
28 visit. Loss of independent living was defined as discharge to a nursing home/hospice or with palliative  
29 care in previously community dwelling patients.  
30  
31  
32  
33  
34  
35  
36

37 Data regarding the outcomes was collected by checking the electronic medical files, which are  
38 connected to the municipal administration and by contacting the general practitioner if necessary.  
39  
40  
41  
42  
43  
44

### 45 *Patient and public involvement*

46  
47 No patient involved.  
48  
49  
50

### 51 *Analysis*

52  
53 The sample size available for this study depended on a prospective cohort study, the RISE-UP study,  
54 which provided data on 450 patients<sup>17</sup>. For logistic regression analysis, at least 10 event per  
55  
56 candidate predictor are needed, according to prediction modelling guidelines. We assumed that the  
57  
58  
59  
60

1  
2  
3 mortality rate would be around 11%. Therefore, the inclusion of 450 patients provided more than  
4  
5 sufficient observations for our primary objective.  
6  
7  
8  
9

10 We performed descriptive analyses of baseline characteristics, biomarker levels and outcomes on the  
11  
12 observed data without imputation of missing values. Continuous variables are reported as means  
13  
14 with standard deviations or medians with interquartile ranges (IQRs) and categorical variables as  
15  
16 proportions. Comparisons between the survivor and non-survivor groups were made using unpaired-  
17  
18 t-tests for continuous variables with Gaussian distribution, Mann-Whitney tests for continuous non-  
19  
20 Gaussian data and Pearson's chi-square or Fisher's exact test for categorical data.  
21  
22  
23  
24

25 We calculated the discriminatory value of the biomarkers for the primary and secondary outcome by  
26  
27 constructing the area under the curves (AUCs) of receiver operating characteristics (ROCs) with 95%  
28  
29 confidence intervals (CIs) on the available data. Accuracy of the AUCs was considered excellent if  
30  
31 between 0.9-1.0, very good if 0.8-0.9, good if 0.7-0.8, sufficient if 0.6-0.7 and bad if between 0.5-0.6  
32  
33  
34  
35 <sup>20</sup>.

36 We divided the biomarkers into 5 groups ranging from lowest through highest values. Next, interval  
37  
38 likelihood ratios (LRs) and mortality percentages were calculated within these groups. We considered  
39  
40 high LRs (>10) and low LR (<0.1) as being of additional value to clinical decision making <sup>21</sup>.  
41  
42

43 We used univariable logistic regression to compute the Odds Ratios (ORs) with 95% CIs for the  
44  
45 biomarkers with respect to 30-day mortality.  
46  
47

48 As a subanalysis, we evaluated the discriminatory ability of a combination of biomarkers. For this  
49  
50 purpose, we used logistic regression with backwards elimination using a p-value of 0.10 for removal  
51  
52 and determined the discriminatory ability of this new model by calculating the AUC with 95% CI.  
53  
54

55  
56 Logistic regression analyses were performed on data after imputation of missing values to allow for  
57  
58 the inclusion of all patients. Sensitivity analyses were performed to assess the impact of missing data  
59  
60

1  
2  
3 on our results by comparing the results after imputation to complete case analysis. Missing values of  
4  
5 biomarkers were imputed using stochastic regression imputation with predictive mean matching  
6  
7 (Supplemental Table S1). All biomarkers were tested for collinearity using Pearson's correlation  
8  
9 coefficient and for influential outliers using Cook's distance. Linearity was visually checked for all  
10  
11 biomarkers and log transformed or dichotomised depending on the relationship with the outcome.  
12  
13 For dichotomisation, the optimum cut-off value was chosen based on the values being closest to the  
14  
15 upper left corner of the AUC. If two values were equally distanced, the Youden's Index was used.  
16  
17 All data were analysed using IBM SPSS Statistics for Windows, Version 24.0, IBM Corp., Armonk, N.Y.,  
18  
19 USA and p-values <0.05 were considered statistically significant.  
20  
21  
22  
23  
24

## 25 **Results**

### 26 *Characteristics of study subjects*

27  
28  
29 For all 450 patients included during the study period follow up was complete (Figure 1). The median  
30  
31 age was 79 years (interquartile range 73-85) and 52% were male. In total, 51 (11.3%) patients died  
32  
33 within 30 days after the ED visit and 201 (44.7%) met the composite endpoint. The patients who died  
34  
35 were older than those who survived (p-value <0.001, Table 1). Non-survivors more frequently  
36  
37 experienced the composite endpoint (n=37, 72.5%) compared to the survivors (n=164, 41.1%, p-  
38  
39 value <0.001).  
40  
41  
42  
43  
44  
45  
46  
47  
48  
49

### 50 *Main results*

#### 51 *Biomarkers*

52  
53 Four biomarkers hs-cTnT, NT-proBNP, D-dimer and PCT were above the reference range in most  
54  
55 patients (66.4, 86.0, 78.0 and 79.8% , resp.), whereas for lactate, this was true in 25.6% of patients.  
56  
57 The highest values of the biomarkers were more often present in non-survivors whereas the lowest  
58  
59  
60

1  
2  
3 values were more often present in survivors, but there was a large overlap between the non-  
4 survivors and survivors (Table 1, Figure 2).  
5  
6  
7  
8  
9

#### 10 *Diagnostic accuracy of the biomarkers*

11 The AUCs for prediction of 30-day mortality were sufficient for lactate and PCT with values of 0.68  
12 (95% CI: 0.59-0.77) and 0.67 (95% CI: 0.60-0.75) resp. (Table 2). The AUCs of the other biomarkers  
13 were good with the highest AUCs for hs-cTnT and NT-proBNP with a value of 0.73 (95% CI 0.66 to  
14 0.80) for both. The AUCs of the biomarkers for the composite endpoint were mostly sufficient, but  
15 lower than for mortality (ranging between 0.58 and 0.67).  
16  
17  
18  
19  
20  
21  
22  
23

24 LRs increased with higher biomarker values, except PCT (Table 3). Most of the biomarkers had  
25 maximum LRs between 3.2 (PCT) and 4.7 (NT-proBNP), except lactate. We retrieved a maximum LR of  
26 29.0 when lactate was between 6.0 and 10.0 mmol/L with a mortality percentage of 80.0%. The  
27 maximum LRs were, however, only applicable to a limited number of patients (n=5). The lowest LRs  
28 for all biomarkers were less variable but ranging between 0.3 (NT-proBNP) and 0.6 (lactate).  
29  
30  
31  
32  
33  
34  
35  
36  
37

#### 38 *Univariable logistic regression analysis*

39 Lactate and D-dimer were dichotomised, and hs-cTnT, NT-proBNP and PCT were logarithmically  
40 transformed because they were not linearly associated with 30-day mortality. The optimum cut-off  
41 value was >1.5 mmol/L for lactate and >3000 µg/L for D-dimer. None of the biomarkers were highly  
42 correlated. In the univariable logistic regression analysis, all biomarkers were strong predictors of 30-  
43 day mortality with p-values of <0.001 (Table 4).  
44  
45  
46  
47  
48  
49  
50  
51  
52

#### 53 *Subanalysis of combining biomarkers*

54 In order to assess the discriminatory value of multiple biomarkers, we developed a model through  
55 backwards elimination in the multiple logistic regression analysis. PCT did not contribute significantly  
56  
57  
58  
59  
60

1  
2  
3 to the model (p-value 0.51) and was therefore removed (Table 4). This resulted in a model consisting  
4  
5 of lactate, hs-cTnT, NT-proBNP and D-dimer. The AUC for prediction of 30-day mortality of these four  
6  
7 biomarkers combined was 0.82 (95% CI: 0.76 – 0.87).  
8  
9

## 10 11 12 13 14 **Discussion**

15  
16  
17  
18 To the best of our knowledge, this is the first study evaluating the discriminatory value of lactate, hs-  
19  
20 cTnT, NT-proBNP, D-dimer and PCT, when measured routinely, for predicting clinical outcome in  
21  
22 older ( $\geq 65$  years) medical ED patients. We conclude that these 5 biomarkers are predictive of 30-day  
23  
24 mortality with the best discriminatory values for hs-cTnT and NT-proBNP (AUCs of 0.73). However,  
25  
26 we observed a large overlap in biomarker values between the survivor and non-survivor group,  
27  
28 resulting in suboptimal LRs. Overall, the predictive ability of the biomarkers for the composite  
29  
30 endpoint turned out to be lower than for the primary endpoint.  
31  
32  
33  
34  
35  
36

37 We showed that lactate, hs-cTnT, NT-proBNP, D-dimer and PCT are sufficient to good predictors of  
38  
39 30-day mortality (AUCs ranging from 0.67 to 0.73) and sufficient predictors of the composite  
40  
41 endpoint (AUCs ranging from 0.58 to 0.67) in older medical ED patients. Other studies showed the  
42  
43 same results<sup>6-8 10 11 22-28</sup>. However, in most of these studies, biomarkers were not measured routinely.  
44  
45 Moreover, two studies showed that mortality was lowest in patients in whom biomarkers were not  
46  
47 ordered during normal clinical practice<sup>47</sup>. These findings show that the predictive value of  
48  
49 biomarkers measured in all older ED patients differs from that measured only when indicated by the  
50  
51 physician. We think that the predictive values we found for the biomarkers are more reflective of  
52  
53 their true prognostic ability than when measured on indication.  
54  
55  
56  
57  
58  
59  
60



1  
2  
3 Despite the fact that the 5 biomarkers were overall predictive of 30-day mortality, on an individual  
4 level, we found a large overlap in biomarker values between survivors and non-survivors. The overlap  
5  
6 in biomarker values was most prominent in patients with non-extreme values. Especially in this  
7  
8 group of patients, it is likely that the prognosis of the patient is less evident to the treating physician.  
9  
10 Therefore, an estimation of prognosis provided by a biomarker is highly important. However, the  
11  
12 discriminatory value of biomarker values in these patients was low as illustrated by the moderate  
13  
14 LRs. In an US study in trauma patients, clinically meaningful contribution to decision making only  
15  
16 occurred at lactate levels of  $>9$  mmol/L<sup>29</sup>, which was only present in a minority of patients. In our  
17  
18 study, lactate had an important LR of 29 when between 6-10 mmol/l, which was only applicable to  
19  
20 five patients. For the secondary composite endpoint, the discriminatory value of the biomarkers was  
21  
22 even lower (ranging between 0.58 and 0.67). Therefore, we conclude that the five biomarkers do not  
23  
24 contribute to clinical decision making.  
25  
26  
27  
28

29  
30 Besides their discriminatory ability, the extra costs for determining the biomarkers should be taken  
31  
32 into account. In more than 90% of patients (75% for lactate), biomarkers were not ordered by the  
33  
34 physician (Supplemental Table S2). Measuring these biomarkers on a routine basis will therefore lead  
35  
36 to direct and indirect costs because abnormal test results (26-86% of results were outside reference  
37  
38 range in our study) will undoubtedly lead to additional diagnostic tests, like CT scans.  
39  
40  
41  
42

43 In the multivariable analysis, stepwise elimination resulted in a new model consisting of four  
44  
45 biomarkers, lactate, hs-cTnT, NT-proBNP and D-dimer, which yielded an AUC of 0.82. This  
46  
47 discriminatory ability was, however, not better than that of the recently developed RISE UP score  
48  
49 (AUC 0.83), which consists of age, vital signs and four routine laboratory tests albumin, blood urea  
50  
51 nitrogen, lactate dehydrogenase, and bilirubin<sup>30</sup>. The RISE UP score was developed in the same  
52  
53 patient sample and has the advantage of using inexpensive variables, which are collected in routine  
54  
55 ED care making the score feasible for use in older ED patients. In addition, we recently showed that  
56  
57 adding these biomarkers to the RISE UP model only minimally improved the AUC of the model by  
58  
59  
60

1  
2  
3 0.03<sup>31</sup>. The limited added discriminatory ability and the expected extra costs support our conclusion  
4  
5 that routinely determined biomarkers are not beneficial for prediction of mortality in older ED  
6  
7 patients.  
8

9  
10 While we showed that biomarkers, measured at the ED visit, predicts 30-day mortality, it is unknown  
11  
12 whether assessment of these parameters will influence clinical decision making, outcome, well-  
13  
14 being, and medical costs. For this reason, the impact of biomarkers on clinical practice and patient  
15  
16 related outcome measures may be an interesting subject for future studies.  
17

18  
19  
20  
21 Our study has some limitations. First, due to moments of crowding of the ED, it was not possible to  
22  
23 include every possible candidate, as physicians had to give priority to providing emergency care. We  
24  
25 detected no evidence for selection bias but cannot exclude it either [17]. In addition, we only  
26  
27 measured biomarker values immediately after arrival at the ED. It is possible that serial biomarker  
28  
29 measurement may have yielded different information and a different predictive ability.  
30  
31

32  
33  
34 In conclusion, the biomarkers lactate, hs-cTnT, NT-proBNP, D-dimer and PCT, when measured  
35  
36 routinely, have predictive value with regard to short-term mortality and other adverse outcomes in  
37  
38 older medical ED patients, but, given the large overlap in values between those with and without  
39  
40 adverse outcomes, they are unlikely to individually contribute to clinical decision making. Therefore,  
41  
42 we conclude that routine measurement of these parameters is not recommended.  
43  
44  
45

#### 46 47 **Acknowledgements**

48  
49 We acknowledge the medical and nursing staff of the emergency department of Zuyderland Medical  
50  
51 Centre for their contribution to our study and most of all, all patients who participated in the study.  
52  
53  
54

#### 55 56 **Author contributions**

1  
2  
3 NZ, JB, PWL and PMS are responsible for developing the research question and study design. NZ and  
4  
5 RH collected all data. NZ and PMS are responsible for study management and data collection. NZ and  
6  
7 SMJK performed the statistical analysis. Data was interpreted by all authors and NZ drafted the first  
8  
9 version of the manuscript. MR performed all laboratory tests. RH, JB, PWL, MR, SMJK and PMS  
10  
11 critically revised the manuscript. All authors have read and approved the final version of the  
12  
13 manuscript.  
14  
15  
16  
17  
18

19 **Funding:** Zuyderland MC supported the study by funding NZ. The funding source had no involvement  
20  
21 in the study design, analysis, interpretation, or decision to submit this work  
22  
23  
24

25 **Conflicts of interest statement:** None of the authors have any conflicts of interest to disclose.  
26  
27  
28  
29

30 **Data sharing:** All data are available upon reasonable request  
31  
32  
33

#### 34 LICENCE STATEMENT A

35  
36 I, the Submitting Author has the right to grant and does grant on behalf of all authors of the Work (as  
37  
38 defined in the below author licence), an exclusive licence and/or a non-exclusive licence for  
39  
40 contributions from authors who are: i) UK Crown employees; ii) where BMJ has agreed a CC-BY  
41  
42 licence shall apply, and/or iii) in accordance with the terms applicable for US Federal Government  
43  
44 officers or employees acting as part of their official duties; on a worldwide, perpetual, irrevocable,  
45  
46 royalty-free basis to BMJ Publishing Group Ltd ("BMJ") its licensees and where the relevant Journal is  
47  
48 co-owned by BMJ to the co-owners of the Journal, to publish the Work in BMJ Open and any other  
49  
50 BMJ products and to exploit all rights, as set out in our licence.  
51  
52  
53

54 The Submitting Author accepts and understands that any supply made under these terms is made by  
55  
56 BMJ to the Submitting Author unless you are acting as an employee on behalf of your employer or a  
57  
58 postgraduate student of an affiliated institution which is paying any applicable article publishing  
59  
60

1  
2  
3 charge (“APC”) for Open Access articles. Where the Submitting Author wishes to make the Work  
4  
5 available on an Open Access basis (and intends to pay the relevant APC), the terms of reuse of such  
6  
7 Open Access shall be governed by a Creative Commons licence – details of these licences and which  
8  
9 Creative Commons licence will apply to this Work are set out in our licence referred to above.  
10  
11  
12  
13  
14  
15  
16  
17  
18  
19  
20  
21  
22  
23  
24  
25  
26  
27  
28  
29  
30  
31  
32  
33  
34  
35  
36  
37  
38  
39  
40  
41  
42  
43

#### References

1. Barfod C, Lundstrom LH, Lauritzen MM, et al. Peripheral venous lactate at admission is associated with in-hospital mortality, a prospective cohort study. *Acta anaesthesiologica Scandinavica* 2015;59(4):514-23. doi: 10.1111/aas.12503 [published Online First: 2015/03/20]
2. Datta D, Walker C, Gray AJ, et al. Arterial lactate levels in an emergency department are associated with mortality: a prospective observational cohort study. *Emergency medicine journal : EMJ* 2015;32(9):673-7. doi: 10.1136/emmermed-2013-203541 [published Online First: 2015/01/21]
3. Pedersen M, Brandt VS, Holler JG, et al. Lactate level, aetiology and mortality of adult patients in an emergency department: a cohort study. *Emergency medicine journal : EMJ* 2015;32(9):678-84. doi: 10.1136/emmermed-2014-204305 [published Online First: 2015/03/11]
4. van den Nouland DP, Brouwers MC, Stassen PM. Prognostic value of plasma lactate levels in a retrospective cohort presenting at a university hospital emergency department. *BMJ open* 2017;7(1):e011450. doi: 10.1136/bmjopen-2016-011450 [published Online First: 2017/02/01]

- 1  
2  
3 5. Bahrmann P, Christ M, Hofner B, et al. Prognostic value of different biomarkers for cardiovascular  
4 death in unselected older patients in the emergency department. *European heart journal*  
5 *Acute cardiovascular care* 2016;5(8):568-78. doi: 10.1177/2048872615612455 [published  
6 Online First: 2015/10/21]
- 7  
8 6. de Groot B, Verdoorn RC, Lameijer J, et al. High-sensitivity cardiac troponin T is an independent  
9 predictor of inhospital mortality in emergency department patients with suspected infection:  
10 a prospective observational derivation study. *Emergency medicine journal : EMJ*  
11 2014;31(11):882-8. doi: 10.1136/emered-2013-202865 [published Online First:  
12 2013/08/24]
- 13  
14 7. Courtney D, Conway R, Kavanagh J, et al. High-sensitivity troponin as an outcome predictor in  
15 acute medical admissions. *Postgraduate medical journal* 2014;90(1064):311-6. doi:  
16 10.1136/postgradmedj-2013-132325 [published Online First: 2014/04/04]
- 17  
18 8. Nickel CH, Kuster T, Keil C, et al. Risk stratification using D-dimers in patients presenting to the  
19 emergency department with nonspecific complaints. *European journal of internal medicine*  
20 2016;31:20-4. doi: 10.1016/j.ejim.2016.03.006 [published Online First: 2016/04/08]
- 21  
22 9. Luchner A, Mockel M, Spanuth E, et al. N-terminal pro brain natriuretic peptide in the  
23 management of patients in the medical emergency department (PROMPT): correlation with  
24 disease severity, utilization of hospital resources, and prognosis in a large, prospective,  
25 randomized multicentre trial. *European journal of heart failure* 2012;14(3):259-67. doi:  
26 10.1093/eurjhf/hfr171 [published Online First: 2012/01/24]
- 27  
28 10. Rodelo JR, De la Rosa G, Valencia ML, et al. D-dimer is a significant prognostic factor in patients  
29 with suspected infection and sepsis. *The American journal of emergency medicine*  
30 2012;30(9):1991-9. doi: 10.1016/j.ajem.2012.04.033 [published Online First: 2012/07/17]
- 31  
32 11. Wilhelm J, Hettwer S, Hammer D, et al. Outcome prediction using clinical scores and biomarkers  
33 in patients with presumed severe infection in the emergency department. *Medizinische*  
34 *Klinik, Intensivmedizin und Notfallmedizin* 2012;107(7):558-63. doi: 10.1007/s00063-012-  
35 0147-5 [published Online First: 2012/08/10]
- 36  
37 12. Freund Y, Delerme S, Goulet H, et al. Serum lactate and procalcitonin measurements in  
38 emergency room for the diagnosis and risk-stratification of patients with suspected infection.  
39 *Biomarkers : biochemical indicators of exposure, response, and susceptibility to chemicals*  
40 2012;17(7):590-6. doi: 10.3109/1354750x.2012.704645 [published Online First: 2012/07/24]
- 41  
42 13. Aminzadeh F, Dalziel WB. Older adults in the emergency department: a systematic review of  
43 patterns of use, adverse outcomes, and effectiveness of interventions. *Annals of emergency*  
44 *medicine* 2002;39(3):238-47. [published Online First: 2002/02/28]
- 45  
46 14. Samaras N, Chevalley T, Samaras D, et al. Older patients in the emergency department: a review.  
47 *Annals of emergency medicine* 2010;56(3):261-9. doi: 10.1016/j.annemergmed.2010.04.015  
48 [published Online First: 2010/07/14]
- 49  
50 15. Salvi F, Morichi V, Grilli A, et al. The elderly in the emergency department: a critical review of  
51 problems and solutions. *Intern Emerg Med* 2007;2(4):292-301. doi: 10.1007/s11739-007-  
52 0081-3 [published Online First: 2007/11/29]
- 53  
54 16. Carpenter CR, Shelton E, Fowler S, et al. Risk factors and screening instruments to predict adverse  
55 outcomes for undifferentiated older emergency department patients: a systematic review  
56 and meta-analysis. *Academic emergency medicine : official journal of the Society for*  
57 *Academic Emergency Medicine* 2015;22(1):1-21. doi: 10.1111/acem.12569 [published Online  
58 First: 2015/01/08]
- 59  
60 17. Zelis N, Buijs J, de Leeuw PW, et al. Study protocol for a multicentre prospective cohort study to  
identify predictors of adverse outcome in older medical emergency department patients (the  
Risk Stratification in the Emergency Department in Acutely Ill Older Patients (RISE UP) study).  
*BMC geriatrics* 2019;19(1):65. doi: 10.1186/s12877-019-1078-2 [published Online First:  
2019/03/06]

18. Charlson ME, Pompei P, Ales KL, et al. A new method of classifying prognostic comorbidity in longitudinal studies: development and validation. *J Chronic Dis* 1987;40(5):373-83. [published Online First: 1987/01/01]
19. Mackway-Jones K. Emergency triage. London: BMJ Publishing Group 1997 1997.
20. Simundic AM. Measures of Diagnostic Accuracy: Basic Definitions. *Ejifcc* 2009;19(4):203-11. [published Online First: 2009/01/01]
21. Grimes DA, Schulz KF. Refining clinical diagnosis with likelihood ratios. *Lancet (London, England)* 2005;365(9469):1500-5. doi: 10.1016/s0140-6736(05)66422-7 [published Online First: 2005/04/27]
22. Kruse O, Grunnet N, Barfod C. Blood lactate as a predictor for in-hospital mortality in patients admitted acutely to hospital: a systematic review. *Scandinavian journal of trauma, resuscitation and emergency medicine* 2011;19:74. doi: 10.1186/1757-7241-19-74 [published Online First: 2011/12/29]
23. Park YJ, Kim DH, Kim SC, et al. Serum lactate upon emergency department arrival as a predictor of 30-day in-hospital mortality in an unselected population. *PLoS one* 2018;13(1):e0190519. doi: 10.1371/journal.pone.0190519 [published Online First: 2018/01/03]
24. Puskarich MA, Illich BM, Jones AE. Prognosis of emergency department patients with suspected infection and intermediate lactate levels: a systematic review. *Journal of critical care* 2014;29(3):334-9. doi: 10.1016/j.jcrc.2013.12.017 [published Online First: 2014/02/25]
25. del Portal DA, Shofer F, Mikkelsen ME, et al. Emergency department lactate is associated with mortality in older adults admitted with and without infections. *Academic emergency medicine : official journal of the Society for Academic Emergency Medicine* 2010;17(3):260-8. doi: 10.1111/j.1553-2712.2010.00681.x [published Online First: 2010/04/08]
26. Marchetti M, Benedetti A, Mimoz O, et al. Predictors of 30-day mortality in patients admitted to ED for acute heart failure. *The American journal of emergency medicine* 2017;35(3):444-47. doi: 10.1016/j.ajem.2016.11.050 [published Online First: 2016/12/04]
27. Meyer B, Huelsmann M, Wexberg P, et al. N-terminal pro-B-type natriuretic peptide is an independent predictor of outcome in an unselected cohort of critically ill patients. *Critical care medicine* 2007;35(10):2268-73. doi: 10.1097/01.Ccm.0000284509.23439.5b [published Online First: 2007/08/25]
28. Zhao Y, Li C, Jia Y. Evaluation of the Mortality in Emergency Department Sepsis score combined with procalcitonin in septic patients. *The American journal of emergency medicine* 2013;31(7):1086-91. doi: 10.1016/j.ajem.2013.04.008 [published Online First: 2013/05/25]
29. Baron BJ, Nguyen A, Stefanov D, et al. Clinical value of triage lactate in risk stratifying trauma patients using interval likelihood ratios. *The American journal of emergency medicine* 2018;36(5):784-88. doi: 10.1016/j.ajem.2017.10.015 [published Online First: 2017/10/17]
30. Zelis N, Buijs J, de Leeuw PW, et al. A new simplified model for predicting 30-day mortality in older medical emergency department patients: The rise up score. *European journal of internal medicine* 2020 doi: 10.1016/j.ejim.2020.02.021 [published Online First: 2020/03/03]
31. Zelis N, Buijs J, de Leeuw PW, et al. Do biomarkers add anything to clinical prediction of mortality in older medical emergency department patients? *European journal of internal medicine* 2020 doi: 10.1016/j.ejim.2020.07.016 [published Online First: 2020/07/29]

**Table 1.** Baseline characteristics of study participants

|                                         | Reference Values | Missing values | Non-survivors N=51 | Survivors N=399  | <sup>a</sup> |
|-----------------------------------------|------------------|----------------|--------------------|------------------|--------------|
| Age, median (IQR), years                |                  | -              | 83 (77-87)         | 79 (73-85)       | ***          |
| Male sex, n (%)                         |                  | -              | 26 (51.0)          | 208 (52.1)       |              |
| Community-dwelling, n (%)               |                  | -              | 36 (70.6)          | 353 (88.5)       | ***          |
| CCI score, median (IQR)                 |                  | -              | 3 (2-5)            | 2 (1-3)          | **           |
| MTS category, n (%)                     |                  | 3 (0.7)        |                    |                  | *            |
| Red                                     |                  |                | 2 (3.9)            | 1 (0.3)          |              |
| Orange                                  |                  |                | 10 (19.6)          | 46 (11.6)        |              |
| Yellow                                  |                  |                | 28 (54.9)          | 226 (57.1)       |              |
| Green                                   |                  |                | 11 (21.6)          | 122 (30.8)       |              |
| Blue                                    |                  |                | -                  | 1 (0.3)          |              |
| <b>Biomarkers</b>                       |                  |                |                    |                  |              |
| lactate, median (IQR), mmol/L           | 0.6-1.8          | 72 (16.0)      | 2.0 (1.5-2.8)      | 1.4 (1.0-1.9)    | ***          |
| hs-cTnT, median (IQR), ng/L             | <14              | 25 (5.6)       | 42 (26-84)         | 21 (12-39)       | ***          |
| NT-proBNP, median (IQR), ng/L           | <125             | 26 (5.8)       | 2766 (943-11597)   | 759 (266-2377)   | ***          |
| D-dimer, median (IQR), µg/L             | <500             | 43 (9.6)       | 3445 (1281-6497)   | 1251 (660-2804)  | ***          |
| PCT, median (IQR), ng/mL                | <0.05            | 26 (5.8)       | 0.32 (0.13-1.40)   | 0.12 (0.06-0.31) | ***          |
| <b>Outcome</b>                          |                  |                |                    |                  |              |
| Composite endpoint <sup>b</sup> , n (%) |                  | -              | 37 (72.5)          | 164 (41.1)       | ***          |

CCI=Charlson Comorbidity Index; hs-cTnT=high-sensitivity cardiac Troponin T; IQR=interquartile range; MTS=Manchester Triage System; NT-proBNP=N-terminal pro-B-type natriuretic peptide; PCT=procalcitonin; SD=standard deviation

Analysis in this table made using non-imputed data

<sup>a</sup>Significant difference between non-survivors and survivors with a p-value of 0.01- <0.05 (\*), 0.001- <0.01 (\*\*) or <0.001 (\*\*\*)

<sup>b</sup>Composite endpoint consisting of ICU/MCU admission, prolonged LOS (>7 days), loss of independent living and unplanned readmission within 30 days after discharge

**Table 2.** AUCs for the biomarkers with respect to mortality and the composite endpoint

| Biomarker | n   | AUC (95 % CI)      |                    |
|-----------|-----|--------------------|--------------------|
|           |     | 30-day mortality   | Composite endpoint |
| lactate   | 378 | 0.68 (0.59 – 0.77) | 0.62 (0.56 – 0.67) |
| hs-cTnT   | 425 | 0.73 (0.66 – 0.80) | 0.67 (0.61 – 0.72) |
| NT-proBNP | 424 | 0.73 (0.66 – 0.80) | 0.65 (0.60 – 0.71) |
| D-dimer   | 407 | 0.70 (0.62 – 0.77) | 0.58 (0.52 – 0.64) |
| PCT       | 424 | 0.67 (0.60 – 0.75) | 0.65 (0.60 – 0.70) |

AUC=area under the curve; CI=confidence interval; hs-cTnT=high-sensitivity cardiac Troponin T; NT-proBNP=N-terminal pro-B-type natriuretic peptide; PCT=procalcitonin

Analysis in this table made using non-imputed data



**Table 3.** Interval likelihood ratios for the biomarkers

| Biomarker               | Mortality |            | N   | LR   | Observed Mortality (%) |
|-------------------------|-----------|------------|-----|------|------------------------|
|                         | Yes (n %) | No (n %)   |     |      |                        |
| <b>lactate (mmol/L)</b> |           |            |     |      |                        |
| 0 – 1.0                 | 5 (10.9)  | 62 (18.7)  | 67  | 0.6  | 7.5                    |
| >1.0 – 2.0              | 20 (43.5) | 197 (59.3) | 217 | 0.7  | 9.2                    |
| >2.0 – 4.0              | 14 (30.4) | 65 (19.6)  | 79  | 1.6  | 17.7                   |
| >4.0 – 6.0              | 3 (6.5)   | 7 (2.1)    | 10  | 3.1  | 30.0                   |
| >6.0 – 10.0             | 4 (8.7)   | 1 (0.3)    | 5   | 29.0 | 80.0                   |
| <b>hs-cTnT (ng/L)</b>   |           |            |     |      |                        |
| 0 – 20                  | 9 (18.4)  | 184 (48.9) | 193 | 0.4  | 4.7                    |
| >20 – 40                | 13 (26.5) | 102 (27.1) | 115 | 1.0  | 11.3                   |
| >40 – 60                | 11 (22.4) | 44 (11.7)  | 55  | 1.9  | 20.0                   |
| >60 – 100               | 8 (16.3)  | 28 (7.4)   | 36  | 2.2  | 22.2                   |
| >100                    | 8 (16.3)  | 18 (4.8)   | 26  | 3.4  | 30.8                   |
| <b>NT-proBNP (ng/L)</b> |           |            |     |      |                        |
| 0 – 500                 | 6 (12.2)  | 150 (40.0) | 156 | 0.3  | 3.8                    |
| >500 – 1000             | 7 (14.3)  | 69 (18.4)  | 76  | 0.8  | 9.2                    |
| >1000 – 2500            | 9 (18.4)  | 67 (17.9)  | 76  | 1.0  | 11.8                   |
| >2500 – 10,000          | 14 (28.6) | 68 (18.1)  | 82  | 1.6  | 17.1                   |
| >10,000                 | 13 (26.5) | 21 (5.6)   | 34  | 4.7  | 38.2                   |
| <b>D-dimer (µg/L)</b>   |           |            |     |      |                        |
| 0 – 1000                | 8 (17.0)  | 149 (41.1) | 157 | 0.4  | 5.1                    |
| >1000 – 2500            | 12 (25.5) | 112 (31.1) | 124 | 0.8  | 9.7                    |
| >2500 – 5000            | 12 (25.5) | 56 (15.6)  | 68  | 1.6  | 17.6                   |
| >5000 – 10,000          | 9 (19.1)  | 30 (8.3)   | 39  | 2.3  | 23.1                   |
| >10,000                 | 6 (12.8)  | 13 (3.6)   | 19  | 3.6  | 31.6                   |
| <b>PCT (ng/L)</b>       |           |            |     |      |                        |
| 0 – 0.1                 | 10 (20.4) | 166 (44.3) | 176 | 0.5  | 5.7                    |
| >0.1 – 0.5              | 16 (32.7) | 137 (36.5) | 153 | 0.9  | 10.5                   |
| >0.5 – 1.0              | 6 (12.2)  | 21 (5.6)   | 27  | 2.2  | 22.2                   |
| >1.0 – 5.0              | 12 (24.5) | 29 (7.7)   | 41  | 3.2  | 29.3                   |
| >5.0                    | 5 (10.2)  | 22 (5.9)   | 27  | 1.7  | 18.5                   |

hs-cTnT=high-sensitivity cardiac Troponin T; LR=likelihood ratio; NT-proBNP=N-terminal pro-B-type natriuretic peptide; PCT=procalcitonin

**Table 4.** Univariable and multivariable logistic regression analysis for 30-day mortality

| Predictors                        | Univariable analysis   |         | Multivariable analysis <sup>a</sup> |         |
|-----------------------------------|------------------------|---------|-------------------------------------|---------|
|                                   | Odds Ratio<br>(95% CI) | p-value | Odds Ratio<br>(95% CI)              | p-value |
| lactate >1.5 mmol/L               | 4.29 (2.18 – 8.44)     | <0.001  | 2.98 (1.46 – 6.09)                  | 0.003   |
| hs-cTnT – per log ng/L increase   | 2.36 (1.70 – 3.27)     | <0.001  | 1.53 (1.01 – 2.32)                  | 0.002   |
| NT-proBNP – per log ng/L increase | 1.78 (1.45 – 2.18)     | <0.001  | 1.49 (1.15 – 1.92)                  | 0.002   |
| D-dimer >3000 µg/L                | 2.91 (1.61 – 5.28)     | <0.001  | 2.77 (1.44 – 5.33)                  | 0.045   |
| PCT – per log ng/mL increase      | 1.34 (1.15 – 1.56)     | <0.001  | -                                   | -       |
|                                   |                        |         | <b>AUC (95% CI)</b>                 |         |
|                                   |                        |         | 0.82 (0.76- 0.87)                   |         |

CI=confidence interval; hs-cTnT=high-sensitivity cardiac Troponin T; log=logarithm; NT-proBNP=N-terminal pro-B-type natriuretic peptide; PCT=procalcitonin

Analysis in this table made using imputed data

<sup>a</sup> Model of biomarkers selected through backwards stepwise elimination using multivariable logistic regression analysis.

1  
2  
3  
4  
5  
6  
7 **Legends of figures**

8 **Figure 1. Flowchart of patient selection**

9  
10 **Figure 2. Distribution of the five biomarkers among survivors and non-survivors.** Bars represent the  
11 proportion of patients with the according biomarker value within the survivor and non-survivor  
12 group.  
13  
14  
15  
16  
17  
18  
19  
20  
21  
22  
23  
24  
25  
26  
27  
28  
29  
30  
31  
32  
33  
34  
35  
36  
37  
38  
39  
40  
41  
42  
43  
44  
45  
46  
47  
48  
49  
50  
51  
52  
53  
54  
55  
56  
57  
58  
59  
60

For peer review only

1  
2  
3  
4  
5  
6  
7  
8  
9  
10  
11  
12  
13  
14  
15  
16  
17  
18  
19  
20  
21  
22  
23  
24  
25  
26  
27  
28  
29  
30  
31  
32  
33  
34  
35  
36  
37  
38  
39  
40  
41  
42  
43  
44  
45  
46  
47  
48  
49  
50  
51  
52  
53  
54  
55  
56  
57  
58  
59  
60

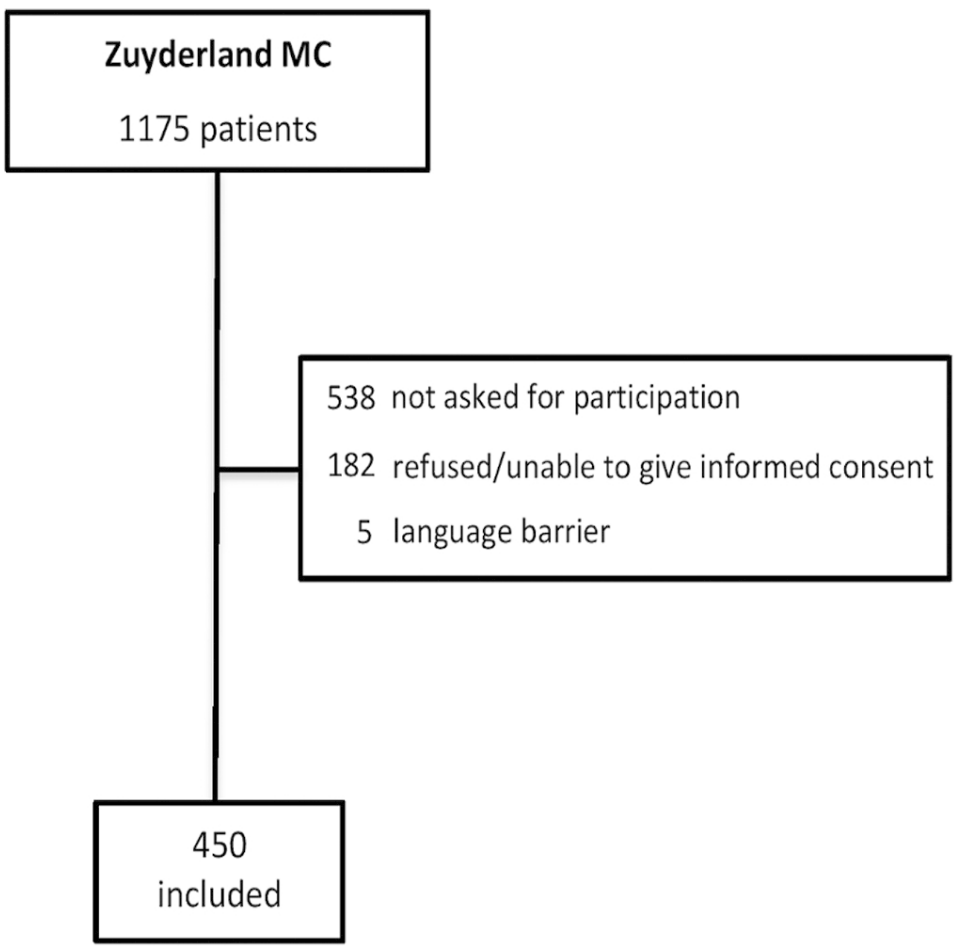

Flowchart of patient inclusion



Figure 2. Distribution of the five biomarkers among survivors and non-survivors. Bars represent the proportion of patients with the according biomarker value within the survivor and non-survivor group.

284x129mm (150 x 150 DPI)

## Supplemental File

## Supplementary tables

**Supplemental Table S1. Overview imputed values**

| Imputed variable | Total<br>(n=450) |
|------------------|------------------|
|                  | n (%)            |
| Lactate          | 72 (16.0)        |
| Hs-cTnT          | 25 (5.6)         |
| NT-proBNP        | 26 (5.8)         |
| D-dimer          | 43 (9.6)         |
| PCT              | 26 (5.8)         |

Hs-cTnT, high-sensitivity cardiac Troponin T; NT-proBNP, N-terminal pro-B-type natriuretic peptide; PCT, procalcitonin

**Supplemental Table S2. Biomarkers ordered by the physician**

| Biomarker | % of patients <sup>a</sup> |
|-----------|----------------------------|
| Lactate   | 25.8                       |
| Hs-cTnT   | 7.6                        |
| NT-proBNP | 8.7                        |
| D-dimer   | 5.1                        |
| PCT       | 0.0                        |

Hs-cTnT, high-sensitivity cardiac Troponin T; NT-pro-BNP, N-terminal pro-B-type natriuretic peptide; PCT, procalcitonin

<sup>a</sup>Represents the proportion of patients for whom the biomarker was ordered by the physician

**STROBE 2007 (v4) Statement—Checklist of items that should be included in reports of *cohort studies***

| Section/Topic                | Item # | Recommendation                                                                                                                                                                       | Reported on page # |
|------------------------------|--------|--------------------------------------------------------------------------------------------------------------------------------------------------------------------------------------|--------------------|
| <b>Title and abstract</b>    | 1      | (a) Indicate the study's design with a commonly used term in the title or the abstract                                                                                               | 1                  |
|                              |        | (b) Provide in the abstract an informative and balanced summary of what was done and what was found                                                                                  | 1                  |
| <b>Introduction</b>          |        |                                                                                                                                                                                      |                    |
| Background/rationale         | 2      | Explain the scientific background and rationale for the investigation being reported                                                                                                 | 4                  |
| Objectives                   | 3      | State specific objectives, including any prespecified hypotheses                                                                                                                     | 4-5                |
| <b>Methods</b>               |        |                                                                                                                                                                                      |                    |
| Study design                 | 4      | Present key elements of study design early in the paper                                                                                                                              | 5                  |
| Setting                      | 5      | Describe the setting, locations, and relevant dates, including periods of recruitment, exposure, follow-up, and data collection                                                      | 5                  |
| Participants                 | 6      | (a) Give the eligibility criteria, and the sources and methods of selection of participants. Describe methods of follow-up                                                           | 5                  |
|                              |        | (b) For matched studies, give matching criteria and number of exposed and unexposed                                                                                                  | n.a.               |
| Variables                    | 7      | Clearly define all outcomes, exposures, predictors, potential confounders, and effect modifiers. Give diagnostic criteria, if applicable                                             | 5-6                |
| Data sources/<br>measurement | 8*     | For each variable of interest, give sources of data and details of methods of assessment (measurement). Describe comparability of assessment methods if there is more than one group | 5-6                |
| Bias                         | 9      | Describe any efforts to address potential sources of bias                                                                                                                            | 6-7                |
| Study size                   | 10     | Explain how the study size was arrived at                                                                                                                                            | 5                  |
| Quantitative variables       | 11     | Explain how quantitative variables were handled in the analyses. If applicable, describe which groupings were chosen and why                                                         | 6-7                |
| Statistical methods          | 12     | (a) Describe all statistical methods, including those used to control for confounding                                                                                                | 6-7                |
|                              |        | (b) Describe any methods used to examine subgroups and interactions                                                                                                                  | n.a.               |
|                              |        | (c) Explain how missing data were addressed                                                                                                                                          | 7                  |
|                              |        | (d) If applicable, explain how loss to follow-up was addressed                                                                                                                       | n.a.               |
|                              |        | (e) Describe any sensitivity analyses                                                                                                                                                | n.a.               |
| <b>Results</b>               |        |                                                                                                                                                                                      |                    |

|                          |     |                                                                                                                                                                                                              |                   |
|--------------------------|-----|--------------------------------------------------------------------------------------------------------------------------------------------------------------------------------------------------------------|-------------------|
| Participants             | 13* | (a) Report numbers of individuals at each stage of study—eg numbers potentially eligible, examined for eligibility, confirmed eligible, included in the study, completing follow-up, and analysed            | 7                 |
|                          |     | (b) Give reasons for non-participation at each stage                                                                                                                                                         | 7 and suppl fig 1 |
|                          |     | (c) Consider use of a flow diagram                                                                                                                                                                           | suppl fig 1       |
| Descriptive data         | 14* | (a) Give characteristics of study participants (eg demographic, clinical, social) and information on exposures and potential confounders                                                                     | 7                 |
|                          |     | (b) Indicate number of participants with missing data for each variable of interest                                                                                                                          | suppl table 1     |
|                          |     | (c) Summarise follow-up time (eg, average and total amount)                                                                                                                                                  | 7                 |
| Outcome data             | 15* | Report numbers of outcome events or summary measures over time                                                                                                                                               | 7                 |
| Main results             | 16  | (a) Give unadjusted estimates and, if applicable, confounder-adjusted estimates and their precision (eg, 95% confidence interval). Make clear which confounders were adjusted for and why they were included | 8 and tables      |
|                          |     | (b) Report category boundaries when continuous variables were categorized                                                                                                                                    | 8 and table 3     |
|                          |     | (c) If relevant, consider translating estimates of relative risk into absolute risk for a meaningful time period                                                                                             | table 3 and 8     |
| Other analyses           | 17  | Report other analyses done—eg analyses of subgroups and interactions, and sensitivity analyses                                                                                                               | n.a.              |
| <b>Discussion</b>        |     |                                                                                                                                                                                                              |                   |
| Key results              | 18  | Summarise key results with reference to study objectives                                                                                                                                                     | 9-11              |
| <b>Limitations</b>       |     |                                                                                                                                                                                                              |                   |
| Interpretation           | 20  | Give a cautious overall interpretation of results considering objectives, limitations, multiplicity of analyses, results from similar studies, and other relevant evidence                                   | 10-11             |
| Generalisability         | 21  | Discuss the generalisability (external validity) of the study results                                                                                                                                        | 9                 |
| <b>Other information</b> |     |                                                                                                                                                                                                              |                   |
| Funding                  | 22  | Give the source of funding and the role of the funders for the present study and, if applicable, for the original study on which the present article is based                                                |                   |

\*Give information separately for cases and controls in case-control studies and, if applicable, for exposed and unexposed groups in cohort and cross-sectional studies.

**Note:** An Explanation and Elaboration article discusses each checklist item and gives methodological background and published examples of transparent reporting. The STROBE checklist is best used in conjunction with this article (freely available on the Web sites of PLoS Medicine at <http://www.plosmedicine.org/>, Annals of Internal Medicine at <http://www.annals.org/>, and Epidemiology at <http://www.epidem.com/>). Information on the STROBE Initiative is available at [www.strobe-statement.org](http://www.strobe-statement.org).
