# Supplementary material for: Value of biomarkers in predicting mortality in older medical emergency department patients: a Dutch prospective study
Source: PubMed Central journal article supplement — BMJ Open. 2021 Jan 31;11(1):e042989. doi: 10.1136/bmjopen-2020-042989 (PMC7852925; doi:10.1136/bmjopen-2020-042989), 2021-01-31
Supplement: bmjopen-2020-042989supp001.pdf [file bmjopen-2020-042989supp001.pdf]

## Supplemental File

## Supplementary tables

**Supplemental Table S1. Overview imputed values**

| Imputed variable | Total<br>(n=450)<br><br>n (%) |
|------------------|-------------------------------|
| Lactate          | 72 (16.0)                     |
| Hs-cTnT          | 25 (5.6)                      |
| NT-proBNP        | 26 (5.8)                      |
| D-dimer          | 43 (9.6)                      |
| PCT              | 26 (5.8)                      |

Hs-cTnT, high-sensitivity cardiac Troponin T; NT-proBNP, N-terminal pro-B-type natriuretic peptide; PCT, procalcitonin

**Supplemental Table S2. Biomarkers ordered by the physician**

| Biomarker | % of patients <sup>a</sup> |
|-----------|----------------------------|
| Lactate   | 25.8                       |
| Hs-cTnT   | 7.6                        |
| NT-proBNP | 8.7                        |
| D-dimer   | 5.1                        |
| PCT       | 0.0                        |

Hs-cTnT, high-sensitivity cardiac Troponin T; NT-pro-BNP, N-terminal pro-B-type natriuretic peptide; PCT, procalcitonin

<sup>a</sup>Represents the proportion of patients for whom the biomarker was ordered by the physician
